# Supplementary material for: The influence of multisite pain and psychological comorbidity on prognosis of chronic low back pain: longitudinal data from the Norwegian HUNT Study
Source: PubMed Central journal article supplement — BMJ Open. 2017 Jun 6;7(5):e015312. doi: 10.1136/bmjopen-2016-015312 (PMC5734202; doi:10.1136/bmjopen-2016-015312), 2017-06-06
Supplement: bmjopen-2016-015312.draft_revisions.pdf [file bmjopen-2016-015312.draft_revisions.pdf]

# BMJ Open

## The influence of multisite pain and psychological comorbidity on prognosis of chronic low back pain: Longitudinal data from the Norwegian HUNT Study

|                                 |                                                                                                                                                                                                                                                                                                                                                                                                                                                                                                                                                                                                |
|---------------------------------|------------------------------------------------------------------------------------------------------------------------------------------------------------------------------------------------------------------------------------------------------------------------------------------------------------------------------------------------------------------------------------------------------------------------------------------------------------------------------------------------------------------------------------------------------------------------------------------------|
| Journal:                        | <i>BMJ Open</i>                                                                                                                                                                                                                                                                                                                                                                                                                                                                                                                                                                                |
| Manuscript ID                   | bmjopen-2016-015312                                                                                                                                                                                                                                                                                                                                                                                                                                                                                                                                                                            |
| Article Type:                   | Research                                                                                                                                                                                                                                                                                                                                                                                                                                                                                                                                                                                       |
| Date Submitted by the Author:   | 29-Nov-2016                                                                                                                                                                                                                                                                                                                                                                                                                                                                                                                                                                                    |
| Complete List of Authors:       | Nordstoga, Anne Lovise; Norwegian University of Science and Technology, Department of Public Health and General Practice<br>Nilsen, Tom; Norwegian University of Science and Technology, Department of Public Health and General Practice<br>Vasseljen, Ottar; Norwegian University of Science and Technology, Department of Public Health and General Practice<br>Unsgaard-Tøndel, Monica; Norwegian University of Science and Technology, Department of Health Science<br>Mork, Paul Jarle; Norwegian University of Science and Technology, Department of Public Health and General Practice |
| <b>Primary Subject Heading</b>: | Epidemiology                                                                                                                                                                                                                                                                                                                                                                                                                                                                                                                                                                                   |
| Secondary Subject Heading:      | Public health                                                                                                                                                                                                                                                                                                                                                                                                                                                                                                                                                                                  |
| Keywords:                       | Spine < ORTHOPAEDIC & TRAUMA SURGERY, Musculoskeletal disorders < ORTHOPAEDIC & TRAUMA SURGERY, Back pain < ORTHOPAEDIC & TRAUMA SURGERY, EPIDEMIOLOGY                                                                                                                                                                                                                                                                                                                                                                                                                                         |
|                                 |                                                                                                                                                                                                                                                                                                                                                                                                                                                                                                                                                                                                |

SCHOLARONE™  
Manuscripts

1  
2  
3 **The influence of multisite pain and psychological comorbidity on prognosis of chronic**  
4 **low back pain: Longitudinal data from the Norwegian HUNT Study**  
5  
6  
7  
8

9 Running head: Comorbidities and prognosis of chronic low back pain  
10  
11  
12

13 AL Nordstoga<sup>1</sup>, TIL Nilsen<sup>1</sup>, O Vasseljen<sup>1</sup>, M Unsgaard-Tøndel<sup>1,2</sup>, PJ Mork<sup>1</sup>  
14  
15

16  
17  
18 <sup>1</sup>Department of Public Health and General Practice, Faculty of Medicine, Norwegian  
19  
20 University of Science and Technology, Trondheim, Norway  
21

22 <sup>2</sup>Department of Health Science, Faculty of Health and Social Science, Norwegian University  
23  
24 of Science and Technology, Trondheim, Norway  
25  
26  
27

28  
29 Corresponding author:

30  
31 Anne Lovise Nordstoga, Department of Public Health and General Practice, Norwegian  
32  
33 University of Science and Technology (NTNU), 7491 Trondheim, Norway.  
34

35 E-mail: [anne.l.nordstoga@ntnu.no](mailto:anne.l.nordstoga@ntnu.no), Phone number : +4799268260  
36  
37  
38

39 Word count: 2979  
40  
41  
42  
43  
44  
45  
46  
47  
48  
49  
50  
51  
52  
53  
54  
55  
56  
57  
58  
59  
60

## ABSTRACT

**Objectives:** This study aimed to investigate the prospective influence of multisite pain, depression, anxiety, self-rated health, and pain-related disability on recovery from chronic low back pain (LBP).

**Setting:** The data is derived from the second (1995-98) and third (2006-08) wave of the Nord-Trøndelag Health Study (HUNT) in Norway.

**Participants:** The study population comprises 4,484 women and 3,039 men in the Norwegian HUNT Study who reported chronic LBP at baseline in 1995-97.

**Primary outcome measures:** The primary outcome was recovery from chronic LBP at the 11-year follow-up. Persons indicating no pain and/or stiffness during the last year, for at least three consecutive months, were defined as recovered. A Poisson regression model was used to estimate adjusted risk ratios (RRs) with 95% confidence intervals (CIs).

**Results:** At follow-up, 1,822 (40.6%) women and 1,578 (51.9%) men reported recovery from chronic LBP. Recovery was inversely and dose-dependently associated with multisite pain in both women and men ( $P$ -trend $<0.001$ ). Compared to the reference category of 2-3 pain sites, RRs for recovery were 1.10 (95% CI, 0.98-1.22) in women and 1.10 (95% CI, 1.01-1.21) in men reporting one pain site and 0.58 (95% CI, 0.52-0.63) in women and 0.70 (95% CI, 0.63-0.79) in men reporting 6-9 pain sites. Poor/not so good self-rated general health was associated with reduced probability of recovery in both women (RR, 0.66 [95% CI, 0.61-0.71]) and men (RR, 0.72 [95% CI, 0.67-0.78]). Psychological symptoms and pain-related disability were more weakly associated with recovery. There was no statistical interaction between multisite pain and the other comorbidities ( $P\geq 0.24$ ).

**Conclusions:** Number of chronic pain sites is inversely and dose-dependently associated with recovery from chronic LBP. Poor self-rated health reduces the probability of recovery,

1  
2  
3 whereas psychological symptoms and disability have weaker influence on prognosis of  
4  
5 chronic LBP.  
6  
7  
8  
9  
10  
11  
12

### 13 **Strengths and limitations of this study**

- 15 - The strengths of the current study are the large and unselected population of women  
16 and men with chronic LBP, the prospective design, and the possibility of adjusting for  
17 several potential confounding factors.  
18  
19
- 20 - A limitation is the lack of follow-up information about the course of LBP and the  
21 other variables between the HUNT2 and HUNT3 study.  
22  
23
- 24 - Furthermore, we cannot rule out that changes in lifestyle was differential between  
25 participants who experienced remission of symptoms versus those who did not, e.g.,  
26 individuals with a high number of pain sites at baseline could be less prone to adopt a  
27 healthy lifestyle during the follow-up period because of pain-related disability.  
28  
29  
30  
31  
32  
33  
34  
35  
36  
37  
38  
39  
40  
41  
42  
43  
44  
45  
46  
47  
48  
49  
50  
51  
52  
53  
54  
55  
56  
57  
58  
59  
60

## INTRODUCTION

Low back pain (LBP) is a common cause of disability and is ranked as the most burdensome disease globally [1, 2]. LBP is the fourth most common diagnosis (after upper respiratory infection, hypertension, and coughing) seen in primary care [3] and approximately every fifth adult suffer from chronic LBP [4]. Thus, in addition to the suffering experienced by affected individuals, LBP represents a substantial economic burden to the society. This underscore the importance of increased knowledge about factors that can improve the prevention and management of chronic LBP.

Chronic LBP rarely exist as a separate entity and co-occurrence of multisite pain and other co-morbidities are common [5-9]. A large case-control study comprising more than 100,000 people showed that individuals with chronic low back had higher occurrence of other musculoskeletal conditions, depression, anxiety, and sleep disorders compared to controls without chronic LBP [10]. In particular, other chronic pain conditions are very prevalent among people with chronic LBP [5]. Number of pain sites by itself has been suggested to be dose-dependently related to reduced physical and mental function [11, 12] and there is also data to support the notion that generalized pain differs markedly from conditions with only one or a few pain sites with respect to other risk factors [13]. Currently, there is a lack of longitudinal studies addressing how the extent of multisite pain influences the prognosis of chronic LBP. Moreover, it is unclear to what extent multisite pain interacts with other comorbid factors such as poor self-rated general health, pain-related disability and poor mental health to influence the prognosis of chronic LBP.

The main objective of this study was therefore to prospectively investigate the influence of common somatic and psychological comorbidities on prognosis of chronic LBP. We hypothesized 1) that multi-site chronic pain, poor self-rated general health, pain-related disability, and poor psychological health are factors that are inversely and independently

1  
2  
3 related to the probability of relief from chronic LBP, and 2) that the possible association  
4  
5 between number of pain sites and prognosis of LBP is modified by other somatic and  
6  
7 psychological comorbidities.  
8  
9

## 11 **METHOD**

### 13 **Study population**

15 In Nord-Trøndelag County, Norway, all inhabitants aged 20 years or older were invited to  
16  
17 participate in three health surveys (the Nord-Trøndelag Health Study [the HUNT Study]), the  
18  
19 first in 1984-86 (HUNT1), the second in 1995-97 (HUNT2), and last in 2006-08 (HUNT3).  
20  
21 The current study is based on data from HUNT2 and HUNT3. Of 93,898 eligible participants,  
22  
23 65,237 (65.5%) accepted the invitation to participate in HUNT2. In HUNT3, a total of 93,860  
24  
25 were invited, and 50,807 (54.1%) accepted the invitation. More detailed information about  
26  
27 selection procedures, participation, and questionnaires used in the HUNT Study can be found  
28  
29 at <http://www.ntnu.edu/hunt>.  
30  
31

32  
33 Information on lifestyle and health related factors were collected by questionnaires  
34  
35 and a clinical examination at both HUNT2 and HUNT3. For the purpose of this study, we  
36  
37 included data from the 37,070 people who participated at both surveys. We excluded 15,062  
38  
39 women and 12,861 men who reported to be free from chronic LBP at HUNT2. Moreover, we  
40  
41 excluded 1,557 persons with missing information on musculoskeletal pain at HUNT3 and 23  
42  
43 persons without complete values on body mass index (BMI) from the clinical examination.  
44  
45 Further, 44 persons defined as underweight (BMI <18.5 kg/m<sup>2</sup>) were additionally excluded  
46  
47 from the analyses. Thus, the prospective analyses were based on 4,484 women and 3,039  
48  
49 men. Each participant signed a written consent, and the study was approved by the Regional  
50  
51 Committee for Ethics in Medical Research (project no. 2014/2044 REK midt, Norway).  
52  
53  
54  
55  
56  
57  
58  
59  
60

### **Chronic low back pain**

The questions about musculoskeletal pain were adopted from the Standard Nordic Questionnaire [14]. The participants were asked “During the last year, have you had pain and/or stiffness in your muscles and joint that lasted for at least three consecutive months?”. Response options were “yes” and “no”. If answering “yes”, the participants were asked to indicate the affected body area(s), i.e., up to nine body areas (neck, shoulders/upper arms, upper back, elbows, low back, wrists/hands, hips, knees, and ankles/feet). Chronic LBP was in both surveys defined by “yes” to the first question and low back indicated as an affected body area by the second questions. Persons who responded “yes” to the first questions but did not indicate low back as an affected body area were considered to be free from chronic LBP. Number of chronic pain sites were estimated by adding together pain-afflicted body areas. The primary outcome was recovery from chronic LBP at the 11-year follow-up. Persons categorized with chronic LBP at HUNT2 responding “no” at HUNT3 to the question “During the last year, have you had pain and/or stiffness in your muscles and joint that lasted for at least three consecutive months?” were defined as recovered.

### **Other variables**

The participants’ self-rated general health was evaluated using the question “How is your health at the moment?”, with response options “very good”, “good”, “not so good”, and “poor”. The answers were dichotomized into two groups: “very good/good” and “not so good/poor” in line with previous studies [15].

Pain-related disability was evaluated separately for work ability and leisure time activity. The question about work ability was: “Have the pain and/or stiffness reduced your ability to work during the last year?” with four possible responses: “no, not significantly”, “to some degree”, “significantly”, and “don’t know”. The first and last response options were

1  
2  
3 merged and categorized as "no disability", and the two middle categories as "work disability".  
4  
5 For leisure time activity, the question was: "Have the pain/or stiffness reduced your leisure  
6  
7 activity?" with possible responses: "yes" and "no". The responses on disability due to  
8  
9 musculoskeletal symptoms were then categorized into four groups; "no disability", "work  
10  
11 disability", "leisure disability", and "work and leisure disability".  
12

13  
14 Symptoms of anxiety and depression were measured using the Hospital Anxiety and  
15  
16 Depression Scale (HADS). HADS is a validated and well-established self-rating  
17  
18 questionnaire including seven questions on anxiety and seven questions on depression [16].  
19  
20 As recommended, the cut-off score value was set to  $\geq 8$  on both anxiety and depression and  
21  
22 were dichotomized as presence or no presence of anxiety and/or depression [16, 17].  
23  
24 Additionally, a mixed HADS variable were constructed consisting of four groups: "no  
25  
26 depression or anxiety", "only depression", "only anxiety", and "both depression and anxiety"  
27  
28 [18]. Symptoms of only depression or only anxiety was defined by a HADS score  $\geq 8$  on the  
29  
30 respective subscales, while symptoms of both depression and anxiety was defined by a  
31  
32 HADS score  $\geq 8$  on both subscales.  
33  
34  
35  
36  
37

### 38 **Statistical analysis**

39  
40 We used a generalized linear model of the Poisson family to estimate the risk ratio (RR) with  
41  
42 95% confidence interval (CI) for recovery from chronic LBP. All estimated associations were  
43  
44 adjusted for age (20-29, 30-39, ...  $\geq 60$  years), BMI (normal weight, overweight, obesity),  
45  
46 physical activity (inactive, low activity, moderate activity, high activity, unknown), education  
47  
48 (primary school, high school, college  $\leq 4$  years, college  $> 4$  years, unknown), smoking (never  
49  
50 smoker, previous smoker, current smoker, unknown) and physical work demands (mostly  
51  
52 sedentary, much walking, much walking and lifting, heavy physical work, unknown). All  
53  
54 main analyses were conducted separately for men and women.  
55  
56  
57  
58  
59  
60



1  
2  
3 Additionally, we conducted analyses combining number of pain sites (<4 vs. 4-9 sites)  
4 and comorbid conditions in relation to the probability of recovery from chronic LBP.  
5  
6 Statistical interaction was evaluated by likelihood ratio tests of a product term of number of  
7 pain sites and each of the comorbid factors (self-reported health, pain-related disability and  
8 HADS). All statistical analyses were performed using Stata for Windows, version 13.1  
9  
10 (StataCorp LP, College Station, Texas).  
11  
12  
13  
14  
15  
16  
17

## 18 RESULTS

19  
20 Table 1 presents the baseline characteristics of the study population according to number of  
21 chronic pain sites. At baseline, 66.4% of the women and 47.2% of the men reported  $\geq 4$  pain  
22 sites. Of the 4,484 women and 3,039 men who reported chronic LBP at baseline (HUNT2),  
23 1,822 (40.6%) women and 1,578 (51.9%) men were reported recovered from chronic LBP at  
24 the 11-year follow-up (HUNT3).  
25  
26  
27  
28  
29

30  
31 Table 2 shows the association between number of pain sites, pain-related disability,  
32 psychological symptoms, self-rated general health, and RRs for recovery from chronic LBP  
33 at follow-up. The probability of recovery was inversely and dose-dependently associated with  
34 number of pain sites (P-trend<0.001 in both women and men). In specific, women and men  
35 who reported 6-9 pain sites had RRs of 0.58 (95% CI, 0.52-0.63) and 0.70 (95% CI, 0.63-  
36 0.79), respectively, compared to women and men who reported 2-3 pain sites. Work or  
37 leisure disability alone was weakly associated with prognosis of chronic LBP while pain-  
38 related disability that influenced both work ability and leisure activity was associated with  
39 reduced probability of recovery in both women (RR, 0.68 [95% CI, 0.62-0.74]) and men (RR,  
40 0.76 [95% CI, 0.70-0.83]). Symptoms of depression or anxiety alone was weakly associated  
41 with prognosis of LBP; however, a HADS score  $\geq 8$  on both subscales was associated with  
42 reduced probability of recovery in both women (RR, 0.77 [95% CI, 0.66-0.91]) and men (RR,  
43  
44  
45  
46  
47  
48  
49  
50  
51  
52  
53  
54  
55  
56  
57  
58  
59  
60

Table 1. Baseline characteristics of the study population stratified by gender and number of chronic pain sites.

|                                                    | Women         |                | Men           |                |
|----------------------------------------------------|---------------|----------------|---------------|----------------|
|                                                    | <4 pain sites | 4-9 pain sites | <4 pain sites | 4-9 pain sites |
| No. of persons (%)                                 | 1,506 (33.6)  | 2,978 (66.4)   | 1,605 (52.8)  | 1,434 (47.2)   |
| Age (years), mean (SD)                             | 47.9 (13.6)   | 50.7 (11.9)    | 48.4 (12.1)   | 51.8 (11.4)    |
| Body mass index (kg/m <sup>2</sup> ), mean (SD)    | 26.1 (4.1)    | 27.0 (4.5)     | 26.5 (3.3)    | 27.0 (3.4)     |
| Physically inactive, no. (%)                       | 82 (5.4)      | 208 (7.0)      | 96 (6.0)      | 103 (7.2)      |
| Education ≤13 years, no. (%)                       | 1142 (75.8)   | 2470 (82.9)    | 1244 (77.5)   | 1220 (85.1)    |
| Current smoker, no. (%)                            | 427 (28.4)    | 1021 (34.3)    | 416 (25.9)    | 412 (28.7)     |
| Poor/not so good self-rated health, no. (%)        | 443 (29.4)    | 1786 (60.0)    | 461 (28.7)    | 831 (57.9)     |
| Pain-related disability, work and leisure, no. (%) | 726 (48.2)    | 2034 (68.3)    | 784 (48.8)    | 970 (67.6)     |
| HADS score depression >8, no. (%)                  | 65 (4.3)      | 187 (6.3)      | 96 (6.0)      | 124 (8.6)      |
| HADS score anxiety >8, no. (%)                     | 149 (9.9)     | 425 (14.3)     | 110 (6.9)     | 147 (10.3)     |

Abbreviations: HADS, Hospital Anxiety and Depression Scale; SD, standard deviation

Table 2. Risk ratio with 95% confidence interval for recovery from chronic low back pain at 11-years follow-up according to number of chronic pain sites, pain-related disability, the Hospital Anxiety and Depression Scale score, and self-rated general health.

|                             | Women          |              |                              |                                         | Men            |              |                              |                                         |
|-----------------------------|----------------|--------------|------------------------------|-----------------------------------------|----------------|--------------|------------------------------|-----------------------------------------|
|                             | No. of persons | No. of cases | Age-adjusted <sup>a</sup> RR | Multi-adjusted <sup>b</sup> RR (95% CI) | No. of persons | No. of cases | Age-adjusted <sup>a</sup> RR | Multi-adjusted <sup>b</sup> RR (95% CI) |
| No. of pain sites           |                |              |                              |                                         |                |              |                              |                                         |
| 1                           | 326            | 189          | 1.12                         | 1.10 (0.98-1.22)                        | 454            | 284          | 1.12                         | 1.10 (1.01-1.21)                        |
| 2-3                         | 1,180          | 608          | 1.00                         | 1.00 (reference)                        | 1,151          | 651          | 1.00                         | 1.00 (reference)                        |
| 4-5                         | 1,330          | 557          | 0.81                         | 0.83 (0.76-0.90)                        | 873            | 422          | 0.85                         | 0.86 (0.79-0.94)                        |
| 6-9                         | 1,648          | 468          | 0.55                         | 0.58 (0.52-0.63)                        | 561            | 221          | 0.69                         | 0.70 (0.63-0.79)                        |
| Pain-related disability     |                |              |                              |                                         |                |              |                              |                                         |
| No disability               | 649            | 355          | 1.00                         | 1.00 (reference)                        | 487            | 304          | 1.00                         | 1.00 (reference)                        |
| Work disability             | 591            | 271          | 0.84                         | 0.87 (0.78-0.98)                        | 430            | 249          | 0.92                         | 0.94 (0.85-1.05)                        |
| Leisure disability          | 257            | 131          | 0.93                         | 0.94 (0.82-1.08)                        | 250            | 143          | 0.91                         | 0.90 (0.79-1.02)                        |
| Work and leisure disability | 2,760          | 964          | 0.64                         | 0.68 (0.62-0.74)                        | 1,754          | 818          | 0.73                         | 0.76 (0.70-0.83)                        |
| HADS                        |                |              |                              |                                         |                |              |                              |                                         |
| No depression or anxiety    | 2,572          | 1,103        | 1.00                         | 1.00 (reference)                        | 2,050          | 1,110        | 1.00                         | 1.00 (reference)                        |
| Depression                  | 252            | 90           | 0.86                         | 0.90 (0.76-1.07)                        | 220            | 101          | 0.84                         | 0.85 (0.73-0.99)                        |
| Anxiety                     | 574            | 215          | 0.87                         | 0.88 (0.78-0.98)                        | 257            | 120          | 0.87                         | 0.88 (0.77-1.01)                        |
| Depression and anxiety      | 342            | 107          | 0.74                         | 0.77 (0.66-0.91)                        | 195            | 80           | 0.76                         | 0.79 (0.67-0.94)                        |
| Self-rated general health   |                |              |                              |                                         |                |              |                              |                                         |
| Very good/good              | 2,208          | 1,099        | 1.00                         | 1.00 (reference)                        | 1,730          | 1,017        | 1.00                         | 1.00 (reference)                        |
| Poor/not so good            | 2,229          | 704          | 0.64                         | 0.66 (0.61-0.71)                        | 1,292          | 551          | 0.70                         | 0.72 (0.67-0.78)                        |

Abbreviations: confidence interval, CI; Hospital Anxiety and Depression Scale, HADS; risk ratio, RR

<sup>a</sup>Adjusted for age (19-29, 30-39, 40-49, 50-59, >60).

<sup>b</sup>Adjusted for age (19-29, 30-39, 40-49, 50-59, >60), education (primary school and lower secondary school, upper secondary school, higher education <4 years, higher education > 4 years, and unknown), body mass index (normal weight, overweight, obesity), physical activity (inactive, low activity, moderate activity, high activity, and unknown), smoking (never smoker, previous smoker, current smoker, and unknown) and physical work demands (mostly sedentary, much walking, much walking and lifting, heavy physical work, and unknown).

Table 3. Risk ratio with 95% confidence interval for recovery from chronic low back pain at 11-years follow-up according to the combined effect of number of chronic pain sites and pain-related disability, score on the hospital anxiety and depression scale, and self-rated general health.

|                                  | 1-3 pain sites |              |                                         | 4-9 pain sites |              |                                         | P value <sup>b</sup> |
|----------------------------------|----------------|--------------|-----------------------------------------|----------------|--------------|-----------------------------------------|----------------------|
|                                  | No. of persons | No. of cases | Multi-adjusted <sup>a</sup> RR (95% CI) | No. of persons | No. of cases | Multi-adjusted <sup>a</sup> RR (95% CI) |                      |
| <b>Pain-related disability</b>   |                |              |                                         |                |              |                                         |                      |
| No disability                    | 714            | 448          | 1.00 (reference)                        | 422            | 211          | 0.84 (0.75-0.94)                        | 0.002                |
| Work disability                  | 466            | 270          | 0.94 (0.85-1.03)                        | 555            | 256          | 0.77 (0.69-0.86)                        | 0.002                |
| Leisure disability               | 271            | 172          | 0.98 (0.88-1.09)                        | 236            | 102          | 0.71 (0.61-0.83)                        | <0.001               |
| Work and leisure disability      | 1,510          | 756          | 0.81 (0.75-0.87)                        | 3,004          | 1,026        | 0.59 (0.54-0.64)                        | <0.001               |
| <b>HADS</b>                      |                |              |                                         |                |              |                                         |                      |
| No depression or anxiety         | 2,151          | 1,225        | 1.00 (reference)                        | 2,471          | 988          | 0.75 (0.70-0.80)                        | <0.001               |
| Depression                       | 161            | 84           | 0.92 (0.79-1.07)                        | 311            | 107          | 0.66 (0.56-0.77)                        | 0.002                |
| Anxiety                          | 259            | 142          | 1.00 (0.89-1.12)                        | 572            | 193          | 0.65 (0.58-0.73)                        | <0.001               |
| Depression and anxiety           | 138            | 69           | 0.92 (0.77-1.09)                        | 399            | 118          | 0.58 (0.49-0.68)                        | <0.001               |
| <b>Self-rated general health</b> |                |              |                                         |                |              |                                         |                      |
| Very good/good                   | 2,187          | 1,302        | 1.00 (reference)                        | 2,617          | 838          | 0.57 (0.53-0.61)                        | <0.001               |
| Not all good/poor                | 904            | 417          | 0.78 (0.72-0.85)                        | 1,751          | 814          | 0.82 (0.77-0.87)                        | 0.301                |

Abbreviations: confidence interval, CI; hospital anxiety and depression scale, HADS; risk ratio, RR.

<sup>a</sup>Adjusted for age (19-29, 30-39, 40-49, 50-59, >60), education (primary school and lower secondary school, upper secondary school, higher education <4 years, higher education > 4 years, and unknown), body mass index (normal weight, overweight, obesity), physical activity (inactive, low activity, moderate activity, high activity, and unknown), gender, smoking (never smoker, previous smoker, current smoker, and unknown) and physical work demands (mostly sedentary, much walking, much walking and lifting, heavy physical work and unknown).

<sup>b</sup>P-value from stratified analysis of number of pain sites by general health, physical function, and HADS score.

1  
2  
3 0.79 [95% CI, 0.67-0.94]). Persons reporting poor or not so good general health had a  
4 markedly reduced probability of recovery, both in women (RR, 0.66 [95% CI, 0.61-0.71])  
5 and men (RR, 0.72 [95% CI, 0.67-0.78]), compared to those reporting good or very good  
6 general health.  
7  
8  
9

10  
11 Table 3 presents the combined effect of number of pain sites and pain-related  
12 disability, psychological symptoms, and self-rated general health. We did not observe any  
13 statistical interaction between number of pain sites and pain-related disability, psychological  
14 symptoms or self-rated health ( $P \geq 0.24$  for all tests). However, stratified analysis within  
15 categories of the exposure variables showed that reporting of  $\geq 4$  pain sites was associated  
16 with lower probability of recovery independently of level of pain-related disability, and  
17 psychological symptoms. Within strata of pain-related disability, persons who reported  $\geq 4$   
18 pain sites had 16% to 27% lower probability of remission compared to persons with 1-3 pain  
19 sites in the same pain-related disability categories. Likewise, within the different strata of  
20 psychological symptoms, persons with  $\geq 4$  pain sites had 25% to 35% lower probability of  
21 recovery compared to persons with 1-3 pain sites.  
22  
23  
24  
25  
26  
27  
28  
29  
30  
31  
32  
33  
34  
35  
36

## 37 **DISCUSSION**

38  
39 In this large population-based study we found that musculoskeletal comorbidity, reduced self-  
40 rated general health, and psychological symptoms were independently associated with  
41 reduced probability of recovery from chronic LBP at 11-year follow-up. The strongest  
42 predictors for poor prognosis were widespread chronic pain (6-9 pain sites) and poor or not  
43 so good self-rated general health. The strength of the associations between the various  
44 comorbidities and pain prognosis was fairly similar for women and men. Probability of relief  
45 from chronic LBP was inversely and dose-dependently associated with number of chronic  
46 pain sites. Although there was no interaction between number of chronic pain sites and other  
47  
48  
49  
50  
51  
52  
53  
54  
55  
56  
57  
58  
59  
60

1  
2  
3 comorbidities, we observed in the combined analysis that persons with four or more pain sites  
4 had consistently lower probability of recovery from chronic LBP within all strata of pain-  
5 related disability and symptoms of depression and/or anxiety. The current findings indicate  
6 that musculoskeletal comorbidity has a strong and independent influence on long-term  
7 prognosis of chronic LBP.  
8  
9  
10  
11  
12

13  
14 It is noteworthy that about 66% of the women and 47% of the men in this study  
15 reported four or more chronic pain sites at baseline. This supports the view that co-  
16 occurrence of musculoskeletal pain is very common in chronic LBP [5, 6]. To our  
17 knowledge, this is the first population-based study to investigate the prospective influence of  
18 graded musculoskeletal comorbidity on the prognosis of chronic LBP. The dose-dependent  
19 association between number of chronic pain sites and reduced probability of recovery from  
20 chronic LBP suggest that musculoskeletal comorbidity should be considered an important  
21 predictor in identifying target groups for public health secondary prevention. This was also  
22 supported by our combined analysis, showing that number of pain sites was the main driving  
23 factor for predicting persistence of chronic LBP.  
24  
25  
26  
27  
28  
29  
30  
31  
32  
33  
34

35  
36 More than 40% of the women and 50% of the men in the current study reported  
37 recovery from chronic LBP at 11-year follow-up. Interestingly, a previous study showed that  
38 the prevalence of chronic LBP was relatively stable from HUNT2 to HUNT3 with about 26%  
39 of women and 20% of men reporting chronic LBP at both surveys [19]. Thus, our results  
40 indicate that during an 11-year period a substantial proportion of the population shift from  
41 having chronic low back to remission, but that a substantial proportion also develops pain in  
42 the same period. Similar large fluctuations in reporting of chronic LBP at the individual level  
43 have also been observed by others [20, 21]. Thus, our findings lend further support to the  
44 notion that chronic LBP on the individual level may fluctuate substantially over time while  
45 the population prevalence remains relatively stable. The current study adds to this knowledge  
46  
47  
48  
49  
50  
51  
52  
53  
54  
55  
56  
57  
58  
59  
60

1  
2  
3 by showing that individuals who shift from having chronic low back symptoms to remission  
4 of symptoms are more likely to have fewer chronic pain sites, less pain-related disability,  
5 better self-rated health, and no major symptoms of anxiety or depression.  
6  
7

8  
9 Number of chronic pain sites were dose-dependently associated with probability of  
10 recovery with women and men who reported 6 or more pain sites having about 30-40% lower  
11 probability of recovery from chronic LBP compared to women and men with 2-3 pain sites.  
12  
13 Number of pain sites have in previous cross-sectional studies been shown to be dose-  
14 dependently associated with a range of negative health outcomes such as psychological  
15 distress, poor sleep, poor self-rated health, reduced social and functional ability [11] as well  
16 as increased sickness absence and health care utilization [22]. The current prospective study  
17 extends this body of knowledge showing that number of chronic pain sites have a strong  
18 dose-dependent influence on prognosis of chronic LBP. Although we observed no interaction  
19 between number of chronic pain sites and other comorbid factors, the probability of relief  
20 from chronic LBP was consistently lower for the group with multisite pain within all strata of  
21 pain-related disability and psychological symptoms scores. These findings support the long-  
22 held view that it may be useful to classify patients with chronic LBP into “back pain alone”  
23 or “back pain plus other pain” to improve clinical decision-making [23].  
24  
25  
26  
27  
28  
29  
30  
31  
32  
33  
34  
35  
36  
37  
38

39 Stratified care of patients with LBP have shown promising results [24, 25]. These  
40 studies used the Keele STarT Back Screening Tool, which was developed to identify patients  
41 with low, medium and high risk of persistent and disabling LBP [26, 27]. The current finding  
42 of a dose-dependent association between number of chronic pain sites and prognosis of  
43 chronic LBP may indicate that the extent of musculoskeletal comorbidity could provide  
44 additional complementary information to improve classification in stratified care approaches.  
45  
46 The idea that assessment of multisite pain can assist clinical judgment of prognosis and  
47 improve targeted treatment has been proposed before [6] and the current data lend further  
48  
49  
50  
51  
52  
53  
54  
55  
56  
57  
58  
59  
60

1  
2  
3 support to this idea. Furthermore, since number of chronic pain sites *per se* seem to be a  
4 strong prognostic factor in chronic LBP it may also be useful to consider this variable when  
5 recruiting subjects into research studies to facilitate baseline comparisons.  
6  
7

8  
9 Although previous data indicate that psychological symptoms are more common in  
10 patients with LBP than in comparable controls [10], our results do not indicate that such  
11 symptoms strongly influence the prognosis of chronic LBP. However, another study of  
12 subjects with neck and/or LBP in HUNT 3 showed that symptoms of mental distress were  
13 significant determinants for seeking health care, which could have moderated the associations  
14 [28]. Our findings are in line with Dunn and colleagues [29] who found no significant  
15 association between depression, and only a modest association between anxiety, and the risk  
16 of disabling LBP at 12-months follow-up in patients presenting with LBP in general practice.  
17 In the same study it was observed that self-rated health had a relatively strong impact on  
18 prognosis of LBP with patients who rated their health as poor having more than twofold  
19 increased risk of disabling back pain. Very few individuals in our study population rated their  
20 health as poor and we were therefore not able to estimate probability for recovery among  
21 these individuals. However, we observed that women and men who rated their health as less  
22 than good (i.e., poor or not so good) had about 30% lower probability of recovery from  
23 chronic LBP compared to those who rated their health as good or very good.  
24  
25  
26  
27  
28  
29  
30  
31  
32  
33  
34  
35  
36  
37  
38  
39  
40

41 The strengths of the current study are the large and unselected population of women  
42 and men with chronic LBP, the prospective design, and the possibility of adjusting for several  
43 potential confounding factors. The questions on chronic musculoskeletal pain used in  
44 HUNT2 have acceptable reliability and validity [14, 30, 31]. Likewise, the HADS scale has  
45 been shown to be a valid indicator of possible depression and anxiety in clinical practice as  
46 well as in the general population [16, 17, 32]. A limitation is the lack of follow-up  
47 information about the course of LBP and the other variables between the HUNT2 and  
48  
49  
50  
51  
52  
53  
54  
55  
56  
57  
58  
59  
60



1  
2  
3 HUNT3 study. Thus, any changes occurring during the follow-up period could not be taken  
4  
5 into account in the analyses. For example, a healthy lifestyle has been associated with  
6  
7 improved long-term outcome in individuals with recurrent LBP episodes [33]. Thus, it may  
8  
9 be possible that individuals who changed their lifestyle during the follow-up period also  
10  
11 altered their course of chronic LBP. Furthermore, we cannot rule out that such changes in  
12  
13 lifestyle was differential between participants who experienced remission of symptoms  
14  
15 versus those who did not, e.g., individuals with a high number of pain sites at baseline could  
16  
17 be less prone to adopt a healthy lifestyle during the follow-up period because of pain-related  
18  
19 disability.  
20

21  
22 In conclusion, the current study indicates that multisite chronic pain is independently  
23  
24 associated with long-term prognosis of chronic LBP. The association is dose-dependent with  
25  
26 increasing number of chronic pain sites being associated with a reduced probability for  
27  
28 recovery from chronic LBP. There was no interaction between number of chronic pain sites  
29  
30 and other common comorbidities such as pain-related disability, psychological symptoms and  
31  
32 self-rated general health. These findings underscore the importance of taking comorbid  
33  
34 symptoms into account, and in particular number of chronic pain sites, when designing  
35  
36 management programs or treatment for secondary prevention of chronic LBP.  
37  
38  
39  
40  
41  
42  
43  
44  
45  
46  
47  
48  
49  
50  
51  
52  
53  
54  
55  
56  
57  
58  
59  
60

### **Author Contributions**

PJM, TILN and ALN designed the study, and all authors contributed in the discussion of the design and interpretation. ALN performed the analyses supervised by PJM and TILN. The first draft of the manuscript was written by PJM and ALN. All authors contributed to the final manuscript.

### **Conflicts of interest**

None declared.

### **Data sharing**

No additional data available.

### **Funding sources**

This study was supported by The Norwegian Fund for Post-Graduate Training in Physiotherapy and by grants from the Liaison Committee between the Central Norway Regional Health Authority and the Norwegian University of Science and Technology (NTNU).

### **Ethical approval**

The current study was approved by the Regional Committee for Ethics in Medical Research (project no. 2014/2044 REK midt, Norway). The study was carried out according to the Declaration of Helsinki.

## References

- 1 Murray CJL, Vos T, Lozano R, *et al.* Disability-adjusted life years (DALYs) for 291 diseases and injuries in 21 regions, 1990-2010: A systematic analysis for the Global Burden of Disease Study 2010. *Lancet* 2012;**380**:2197-223.
- 2 Vos T, Flaxman AD, Naghavi M, *et al.* Years lived with disability (YLDs) for 1160 sequelae of 289 diseases and injuries 1990-2010: A systematic analysis for the Global Burden of Disease Study 2010. *Lancet* 2012;**380**:2163-96.
- 3 Wändell P, Carlsson AC, Wettermark B, *et al.* Most common diseases diagnosed in primary care in Stockholm, Sweden, in 2011. *Fam Pract* 2013;**30**:506-13.
- 4 Hoy D, Bain C, Williams G, *et al.* A systematic review of the global prevalence of low back pain. *Arthritis and rheumatism* 2012;**64**:2028-37.
- 5 Von Korff M, Crane P, Lane M, *et al.* Chronic spinal pain and physical-mental comorbidity in the United States: results from the national comorbidity survey replication. *Pain* 2005;**113**:331-9.
- 6 Hartvigsen J, Natvig B, Ferreira M. Is it all about a pain in the back? *Best Pract Res Clin Rheumatol* 2013;**27**:613-23.
- 7 Croft P. The question is not "have you got it"? But "how much of it have you got"? *Pain* 2009;**141**:6-7.
- 8 Hestbaek L, Leboeuf-Yde C, Manniche C. Is low back pain part of a general health pattern or is it a separate and distinctive entity? A critical literature review of comorbidity with low back pain. *J Manipulative Physiol Ther* 2003;**26**:243-52.
- 9 Ramond-Roquin A, Pecquenard F, Schers H, *et al.* Psychosocial, musculoskeletal and somatoform comorbidity in patients with chronic low back pain: original results from the Dutch Transition Project. *Fam Pract* 2015;**32**:297-304.

- 1  
2  
3 10 Gore M, Sadosky A, Stacey BR, *et al.* The burden of chronic low back pain: clinical  
4 comorbidities, treatment patterns, and health care costs in usual care settings. *Spine*  
5 2012;**37**:E668-77.  
6  
7  
8  
9 11 Kamaleri Y, Natvig B, Ihlebaek CM, *et al.* Number of pain sites is associated with  
10 demographic, lifestyle, and health-related factors in the general population. *Eur J Pain*  
11 2008;**12**:742-8.  
12  
13  
14  
15 12 Kamaleri Y, Natvig B, Ihlebaek CM, *et al.* Localized or widespread musculoskeletal  
16 pain: does it matter? *Pain* 2008;**138**:41-6.  
17  
18  
19  
20 13 Coggon D, Ntani G, Palmer KT, *et al.* Patterns of multisite pain and associations with  
21 risk factors. *Pain* 2013;**154**:1769-77.  
22  
23  
24  
25 14 Kuorinka I, Jonsson B, Kilbom A, *et al.* Standardized nordic questionnaires for the  
26 analysis of musculoskeletal symptoms. *Applied Ergonomics* 1987;**18**:233-7.  
27  
28  
29 15 Krokstad S, Kunst AE, Westin S. Trends in health inequalities by educational level in  
30 a Norwegian total population study. *J Epidemiol Community Health* 2002;**56**:375-80.  
31  
32  
33 16 Bjelland I, Dahl AA, Haug TT, *et al.* The validity of the Hospital Anxiety and  
34 Depression Scale. An updated literature review. *J Psychosom Res* 2002;**52**:69-77.  
35  
36  
37 17 Lisspers J, Nygren A, Soderman E. Hospital Anxiety and Depression Scale (HAD):  
38 some psychometric data for a Swedish sample. *Acta Psychiatr Scand* 1997;**96**:281-6.  
39  
40  
41 18 Mundal I, Grawe RW, Bjorngaard JH, *et al.* Prevalence and long-term predictors of  
42 persistent chronic widespread pain in the general population in an 11-year prospective study:  
43 the HUNT study. *BMC Musculoskelet Disord* 2014;**15**:213.  
44  
45  
46  
47 19 Hagen K, Linde M, Heuch I, *et al.* Increasing prevalence of chronic musculoskeletal  
48 complaints. A large 11-year follow-up in the general population (HUNT 2 and 3). *Pain Med*  
49 2011;**12**:1657-66.  
50  
51  
52  
53  
54  
55  
56  
57  
58  
59  
60

- 1  
2  
3 20 Hestbaek L, Leboeuf-Yde C, Engberg M, *et al.* The course of low back pain in a  
4 general population. Results from a 5-year prospective study. *Journal of Manipulative and*  
5 *Physiological Therapeutics* 2003;**26**:213-9.  
6  
7  
8  
9 21 Tamcan O, Mannion AF, Eisenring C, *et al.* The course of chronic and recurrent low  
10 back pain in the general population. *Pain* 2010;**150**:451-7.  
11  
12  
13 22 de Fernandes RC, Burdorf A. Associations of multisite pain with healthcare  
14 utilization, sickness absence and restrictions at work. *International Archives of Occupational*  
15 *and Environmental Health [Epub ahead of print]* 2016  
16  
17  
18 23 Natvig B, Bruusgaard D, Eriksen W. Localized low back pain and low back pain as  
19 part of widespread musculoskeletal pain: two different disorders? A cross-sectional  
20 population study. *J Rehabil Med* 2001;**33**:21-5.  
21  
22  
23 24 Hill JC, Whitehurst DGT, Lewis M, *et al.* Comparison of stratified primary care  
24 management for low back pain with current best practice (STarT Back): A randomised  
25 controlled trial. *The Lancet* 2011;**378**:1560-71.  
26  
27  
28 25 Murphy SE, Blake C, Power CK, *et al.* Comparison of a Stratified Group Intervention  
29 (STarT Back) With Usual Group Care in Patients With Low Back Pain: A Nonrandomized  
30 Controlled Trial. *Spine* 2016;**41**:645-52.  
31  
32  
33 26 Hill JC, Dunn KM, Lewis M, *et al.* A primary care back pain screening tool:  
34 identifying patient subgroups for initial treatment. *Arthritis Rheum* 2008;**59**:632-41.  
35  
36  
37 27 Hill JC, Vohora K, Dunn KM, *et al.* Comparing the STarT back screening tool's  
38 subgroup allocation of individual patients with that of independent clinical experts. *Clin J*  
39 *Pain* 2010;**26**:783-7.  
40  
41  
42 28 Woodhouse A, Pape K, Romundstad PR, *et al.* Health care contact following a new  
43 incident neck or low back pain episode in the general population: The HUNT study. *BMC*  
44 *Health Serv Res* 2016;**16**:81.  
45  
46  
47  
48  
49  
50  
51  
52  
53  
54  
55  
56  
57  
58  
59  
60

- 1  
2  
3 29 Dunn KM, Jordan KP, Croft PR. Contributions of prognostic factors for poor outcome  
4 in primary care low back pain patients. *Eur J Pain* 2011;**15**:313-9.  
5  
6  
7 30 Descatha A, Roquelaure Y, Chastang JF, *et al.* Validity of Nordic-style questionnaires  
8 in the surveillance of upper-limb work-related musculoskeletal disorders. *Scand J Work*  
9  
10  
11  
12 *Environ Health* 2007;**33**:58-65.  
13  
14 31 Palmer K, Smith G, Kellingray S, *et al.* Repeatability and validity of an upper limb  
15 and neck discomfort questionnaire: The utility of the standardized Nordic questionnaire.  
16  
17  
18 *Occupational Medicine* 1999;**49**:171-5.  
19  
20 32 Østby-Deglum I, Mykletun A, Dahl AA. The Hospital Anxiety and Depression Rating  
21 Scale (HADS) as a case finder for anxiety disorder and depression in Norwegian general  
22  
23  
24 practices. *Acta Psychiatrica Scandinavica* 2004;**110**:43-4.  
25  
26  
27 33 Bohman T, Alfredsson L, Jensen I, *et al.* Does a healthy lifestyle behaviour influence  
28 the prognosis of low back pain among men and women in a general population? A  
29  
30  
31 population-based cohort study. *BMJ Open* 2014;**4**:e005713.  
32  
33  
34  
35  
36  
37  
38  
39  
40  
41  
42  
43  
44  
45  
46  
47  
48  
49  
50  
51  
52  
53  
54  
55  
56  
57  
58  
59  
60

Table 1. Baseline characteristics of the study population stratified by gender and number of chronic pain sites.

|                                                    | Women         |                | Men           |                |
|----------------------------------------------------|---------------|----------------|---------------|----------------|
|                                                    | <4 pain sites | 4-9 pain sites | <4 pain sites | 4-9 pain sites |
| No. of persons (%)                                 | 1,506 (33.6)  | 2,978 (66.4)   | 1,605 (52.8)  | 1,434 (47.2)   |
| Age (years), mean (SD)                             | 47.9 (13.6)   | 50.7 (11.9)    | 48.4 (12.1)   | 51.8 (11.4)    |
| Body mass index (kg/m <sup>2</sup> ), mean (SD)    | 26.1 (4.1)    | 27.0 (4.5)     | 26.5 (3.3)    | 27.0 (3.4)     |
| Physically inactive, no. (%)                       | 82 (5.4)      | 208 (7.0)      | 96 (6.0)      | 103 (7.2)      |
| Education ≤13 years, no. (%)                       | 1142 (75.8)   | 2470 (82.9)    | 1244 (77.5)   | 1220 (85.1)    |
| Current smoker, no. (%)                            | 427 (28.4)    | 1021 (34.3)    | 416 (25.9)    | 412 (28.7)     |
| Poor/not so good self-rated health, no. (%)        | 443 (29.4)    | 1786 (60.0)    | 461 (28.7)    | 831 (57.9)     |
| Pain-related disability, work and leisure, no. (%) | 726 (48.2)    | 2034 (68.3)    | 784 (48.8)    | 970 (67.6)     |
| HADS score depression >8, no. (%)                  | 65 (4.3)      | 187 (6.3)      | 96 (6.0)      | 124 (8.6)      |
| HADS score anxiety >8, no. (%)                     | 149 (9.9)     | 425 (14.3)     | 110 (6.9)     | 147 (10.3)     |

Abbreviations: HADS, Hospital Anxiety and Depression Scale; SD, standard deviation

Table 2. Risk ratio with 95% confidence interval for recovery from chronic low back pain at 11-years follow-up according to number of chronic pain sites, pain-related disability, the Hospital Anxiety and Depression Scale score, and self-rated general health.

|                                  | Women          |              |                              |                                         | Men            |              |                              |                                         |
|----------------------------------|----------------|--------------|------------------------------|-----------------------------------------|----------------|--------------|------------------------------|-----------------------------------------|
|                                  | No. of persons | No. of cases | Age-adjusted <sup>a</sup> RR | Multi-adjusted <sup>b</sup> RR (95% CI) | No. of persons | No. of cases | Age-adjusted <sup>a</sup> RR | Multi-adjusted <sup>b</sup> RR (95% CI) |
| <b>No. of pain sites</b>         |                |              |                              |                                         |                |              |                              |                                         |
| 1                                | 326            | 189          | 1.12                         | 1.10 (0.98-1.22)                        | 454            | 284          | 1.12                         | 1.10 (1.01-1.21)                        |
| 2-3                              | 1,180          | 608          | 1.00                         | 1.00 (reference)                        | 1,151          | 651          | 1.00                         | 1.00 (reference)                        |
| 4-5                              | 1,330          | 557          | 0.81                         | 0.83 (0.76-0.90)                        | 873            | 422          | 0.85                         | 0.86 (0.79-0.94)                        |
| 6-9                              | 1,648          | 468          | 0.55                         | 0.58 (0.52-0.63)                        | 561            | 221          | 0.69                         | 0.70 (0.63-0.79)                        |
| <b>Pain-related disability</b>   |                |              |                              |                                         |                |              |                              |                                         |
| No disability                    | 649            | 355          | 1.00                         | 1.00 (reference)                        | 487            | 304          | 1.00                         | 1.00 (reference)                        |
| Work disability                  | 591            | 271          | 0.84                         | 0.87 (0.78-0.98)                        | 430            | 249          | 0.92                         | 0.94 (0.85-1.05)                        |
| Leisure disability               | 257            | 131          | 0.93                         | 0.94 (0.82-1.08)                        | 250            | 143          | 0.91                         | 0.90 (0.79-1.02)                        |
| Work and leisure disability      | 2,760          | 964          | 0.64                         | 0.68 (0.62-0.74)                        | 1,754          | 818          | 0.73                         | 0.76 (0.70-0.83)                        |
| <b>HADS</b>                      |                |              |                              |                                         |                |              |                              |                                         |
| No depression or anxiety         | 2,572          | 1,103        | 1.00                         | 1.00 (reference)                        | 2,050          | 1,110        | 1.00                         | 1.00 (reference)                        |
| Depression                       | 252            | 90           | 0.86                         | 0.90 (0.76-1.07)                        | 220            | 101          | 0.84                         | 0.85 (0.73-0.99)                        |
| Anxiety                          | 574            | 215          | 0.87                         | 0.88 (0.78-0.98)                        | 257            | 120          | 0.87                         | 0.88 (0.77-1.01)                        |
| Depression and anxiety           | 342            | 107          | 0.74                         | 0.77 (0.66-0.91)                        | 195            | 80           | 0.76                         | 0.79 (0.67-0.94)                        |
| <b>Self-rated general health</b> |                |              |                              |                                         |                |              |                              |                                         |
| Very good/good                   | 2,208          | 1,099        | 1.00                         | 1.00 (reference)                        | 1,730          | 1,017        | 1.00                         | 1.00 (reference)                        |
| Poor/not so good                 | 2,229          | 704          | 0.64                         | 0.66 (0.61-0.71)                        | 1,292          | 551          | 0.70                         | 0.72 (0.67-0.78)                        |

Abbreviations: confidence interval, CI; Hospital Anxiety and Depression Scale, HADS; risk ratio, RR

<sup>a</sup>Adjusted for age (19-29, 30-39, 40-49, 50-59, >60).

<sup>b</sup>Adjusted for age (19-29, 30-39, 40-49, 50-59, >60), education (primary school and lower secondary school, upper secondary school, higher education <4 years, higher education > 4 years, and unknown), body mass index (normal weight, overweight, obesity), physical activity (inactive, low activity, moderate activity, high activity, and unknown), smoking (never smoker, previous smoker, current smoker, and unknown) and physical work demands (mostly sedentary, much walking, much walking and lifting, heavy physical work, and unknown).



Table 3. Risk ratio with 95% confidence interval for recovery from chronic low back pain at 11-years follow-up according to the combined effect of number of chronic pain sites and pain-related disability, score on the hospital anxiety and depression scale, and self-rated general health.

|                             | 1-3 pain sites |              |                                         | 4-9 pain sites |              |                                         | P value <sup>b</sup> |
|-----------------------------|----------------|--------------|-----------------------------------------|----------------|--------------|-----------------------------------------|----------------------|
|                             | No. of persons | No. of cases | Multi-adjusted <sup>a</sup> RR (95% CI) | No. of persons | No. of cases | Multi-adjusted <sup>a</sup> RR (95% CI) |                      |
| Pain-related disability     |                |              |                                         |                |              |                                         |                      |
| No disability               | 714            | 448          | 1.00 (reference)                        | 422            | 211          | 0.84 (0.75-0.94)                        | 0.002                |
| Work disability             | 466            | 270          | 0.94 (0.85-1.03)                        | 555            | 256          | 0.77 (0.69-0.86)                        | 0.002                |
| Leisure disability          | 271            | 172          | 0.98 (0.88-1.09)                        | 236            | 102          | 0.71 (0.61-0.83)                        | <0.001               |
| Work and leisure disability | 1,510          | 756          | 0.81 (0.75-0.87)                        | 3,004          | 1,026        | 0.59 (0.54-0.64)                        | <0.001               |
| HADS                        |                |              |                                         |                |              |                                         |                      |
| No depression or anxiety    | 2,151          | 1,225        | 1.00 (reference)                        | 2,471          | 988          | 0.75 (0.70-0.80)                        | <0.001               |
| Depression                  | 161            | 84           | 0.92 (0.79-1.07)                        | 311            | 107          | 0.66 (0.56-0.77)                        | 0.002                |
| Anxiety                     | 259            | 142          | 1.00 (0.89-1.12)                        | 572            | 193          | 0.65 (0.58-0.73)                        | <0.001               |
| Depression and anxiety      | 138            | 69           | 0.92 (0.77-1.09)                        | 399            | 118          | 0.58 (0.49-0.68)                        | <0.001               |
| Self-rated general health   |                |              |                                         |                |              |                                         |                      |
| Very good/good              | 2,187          | 1,302        | 1.00 (reference)                        | 2,617          | 838          | 0.57 (0.53-0.61)                        | <0.001               |
| Not all good/poor           | 904            | 417          | 0.78 (0.72-0.85)                        | 1,751          | 814          | 0.82 (0.77-0.87)                        | 0.301                |

Abbreviations: confidence interval, CI; hospital anxiety and depression scale, HADS; risk ratio, RR.

<sup>a</sup>Adjusted for age (19-29, 30-39, 40-49, 50-59, >60), education (primary school and lower secondary school, upper secondary school, higher education <4 years, higher education > 4 years, and unknown), body mass index (normal weight, overweight, obesity), physical activity (inactive, low activity, moderate activity, high activity, and unknown), gender, smoking (never smoker, previous smoker, current smoker, and unknown) and physical work demands (mostly sedentary, much walking, much walking and lifting, heavy physical work and unknown).

<sup>b</sup>P value from stratified analysis of number of pain sites by general health, physical function, and HADS score.

**STROBE 2007 (v4) Statement—Checklist of items that should be included in reports of cohort studies**

| Section/Topic             | Item # | Recommendation                                                                                                                                                                       | Reported on page # |
|---------------------------|--------|--------------------------------------------------------------------------------------------------------------------------------------------------------------------------------------|--------------------|
| Title and abstract        | 1      | (a) Indicate the study’s design with a commonly used term in the title or the abstract                                                                                               | 1                  |
|                           |        | (b) Provide in the abstract an informative and balanced summary of what was done and what was found                                                                                  | 2                  |
| <b>Introduction</b>       |        |                                                                                                                                                                                      | <b>4</b>           |
| Background/rationale      | 2      | Explain the scientific background and rationale for the investigation being reported                                                                                                 | 4                  |
| Objectives                | 3      | State specific objectives, including any prespecified hypotheses                                                                                                                     | 4/5                |
| <b>Methods</b>            |        |                                                                                                                                                                                      | <b>5</b>           |
| Study design              | 4      | Present key elements of study design early in the paper                                                                                                                              | 5                  |
| Setting                   | 5      | Describe the setting, locations, and relevant dates, including periods of recruitment, exposure, follow-up, and data collection                                                      | 5                  |
| Participants              | 6      | (a) Give the eligibility criteria, and the sources and methods of selection of participants. Describe methods of follow-up                                                           | 5                  |
|                           |        | (b) For matched studies, give matching criteria and number of exposed and unexposed                                                                                                  |                    |
| Variables                 | 7      | Clearly define all outcomes, exposures, predictors, potential confounders, and effect modifiers. Give diagnostic criteria, if applicable                                             | 6/7                |
| Data sources/ measurement | 8*     | For each variable of interest, give sources of data and details of methods of assessment (measurement). Describe comparability of assessment methods if there is more than one group | 6/7                |
| Bias                      | 9      | Describe any efforts to address potential sources of bias                                                                                                                            |                    |
| Study size                | 10     | Explain how the study size was arrived at                                                                                                                                            | 5                  |
| Quantitative variables    | 11     | Explain how quantitative variables were handled in the analyses. If applicable, describe which groupings were chosen and why                                                         | 6/7                |
| Statistical methods       | 12     | (a) Describe all statistical methods, including those used to control for confounding                                                                                                | 7/8                |
|                           |        | (b) Describe any methods used to examine subgroups and interactions                                                                                                                  |                    |
|                           |        | (c) Explain how missing data were addressed                                                                                                                                          |                    |
|                           |        | (d) If applicable, explain how loss to follow-up was addressed                                                                                                                       |                    |
|                           |        | (e) Describe any sensitivity analyses                                                                                                                                                |                    |
| <b>Results</b>            |        |                                                                                                                                                                                      | <b>8</b>           |

|                          |     |                                                                                                                                                                                                              |          |
|--------------------------|-----|--------------------------------------------------------------------------------------------------------------------------------------------------------------------------------------------------------------|----------|
| Participants             | 13* | (a) Report numbers of individuals at each stage of study—eg numbers potentially eligible, examined for eligibility, confirmed eligible, included in the study, completing follow-up, and analysed            | 8        |
|                          |     | (b) Give reasons for non-participation at each stage                                                                                                                                                         | 5        |
|                          |     | (c) Consider use of a flow diagram                                                                                                                                                                           |          |
| Descriptive data         | 14* | (a) Give characteristics of study participants (eg demographic, clinical, social) and information on exposures and potential confounders                                                                     | 8/9      |
|                          |     | (b) Indicate number of participants with missing data for each variable of interest                                                                                                                          | 10/11    |
|                          |     | (c) Summarise follow-up time (eg, average and total amount)                                                                                                                                                  |          |
| Outcome data             | 15* | Report numbers of outcome events or summary measures over time                                                                                                                                               | 10/11    |
| Main results             | 16  | (a) Give unadjusted estimates and, if applicable, confounder-adjusted estimates and their precision (eg, 95% confidence interval). Make clear which confounders were adjusted for and why they were included | 8 and 12 |
|                          |     | (b) Report category boundaries when continuous variables were categorized                                                                                                                                    |          |
|                          |     | (c) If relevant, consider translating estimates of relative risk into absolute risk for a meaningful time period                                                                                             |          |
| Other analyses           | 17  | Report other analyses done—eg analyses of subgroups and interactions, and sensitivity analyses                                                                                                               | 12       |
| <b>Discussion</b>        |     |                                                                                                                                                                                                              | 12       |
| Key results              | 18  | Summarise key results with reference to study objectives                                                                                                                                                     | 12       |
| <b>Limitations</b>       |     |                                                                                                                                                                                                              |          |
| Interpretation           | 20  | Give a cautious overall interpretation of results considering objectives, limitations, multiplicity of analyses, results from similar studies, and other relevant evidence                                   | 13/16    |
| Generalisability         | 21  | Discuss the generalisability (external validity) of the study results                                                                                                                                        | 16       |
| <b>Other information</b> |     |                                                                                                                                                                                                              |          |
| Funding                  | 22  | Give the source of funding and the role of the funders for the present study and, if applicable, for the original study on which the present article is based                                                | 17       |

\*Give information separately for cases and controls in case-control studies and, if applicable, for exposed and unexposed groups in cohort and cross-sectional studies.

**Note:** An Explanation and Elaboration article discusses each checklist item and gives methodological background and published examples of transparent reporting. The STROBE checklist is best used in conjunction with this article (freely available on the Web sites of PLoS Medicine at <http://www.plosmedicine.org/>, Annals of Internal Medicine at <http://www.annals.org/>, and Epidemiology at <http://www.epidem.com/>). Information on the STROBE Initiative is available at [www.strobe-statement.org](http://www.strobe-statement.org).

# BMJ Open

## The influence of multisite pain and psychological comorbidity on prognosis of chronic low back pain: Longitudinal data from the Norwegian HUNT Study

|                                 |                                                                                                                                                                                                                                                                                                                                                                                                                                                                                                                                                                                |
|---------------------------------|--------------------------------------------------------------------------------------------------------------------------------------------------------------------------------------------------------------------------------------------------------------------------------------------------------------------------------------------------------------------------------------------------------------------------------------------------------------------------------------------------------------------------------------------------------------------------------|
| Journal:                        | <i>BMJ Open</i>                                                                                                                                                                                                                                                                                                                                                                                                                                                                                                                                                                |
| Manuscript ID                   | bmjopen-2016-015312.R1                                                                                                                                                                                                                                                                                                                                                                                                                                                                                                                                                         |
| Article Type:                   | Research                                                                                                                                                                                                                                                                                                                                                                                                                                                                                                                                                                       |
| Date Submitted by the Author:   | 21-Mar-2017                                                                                                                                                                                                                                                                                                                                                                                                                                                                                                                                                                    |
| Complete List of Authors:       | Nordstoga, Anne Lovise; Norwegian University of Science and Technology, Department of Public Health and Nursing<br>Nilsen, Tom; Norwegian University of Science and Technology, Department of Public Health and Nursing<br>Vasseljen, Ottar; Norwegian University of Science and Technology, Department of Public Health and Nursing<br>Unsgaard-Tøndel, Monica; Norwegian University of Science and Technology, Department of Neuromedicine and Movement Science<br>Mork, Paul Jarle; Norwegian University of Science and Technology, Department of Public Health and Nursing |
| <b>Primary Subject Heading</b>: | Epidemiology                                                                                                                                                                                                                                                                                                                                                                                                                                                                                                                                                                   |
| Secondary Subject Heading:      | Public health                                                                                                                                                                                                                                                                                                                                                                                                                                                                                                                                                                  |
| Keywords:                       | Spine < ORTHOPAEDIC & TRAUMA SURGERY, Musculoskeletal disorders < ORTHOPAEDIC & TRAUMA SURGERY, Back pain < ORTHOPAEDIC & TRAUMA SURGERY, EPIDEMIOLOGY                                                                                                                                                                                                                                                                                                                                                                                                                         |
|                                 |                                                                                                                                                                                                                                                                                                                                                                                                                                                                                                                                                                                |

SCHOLARONE™  
Manuscripts

1  
2  
3 **The influence of multisite pain and psychological comorbidity on prognosis of chronic**  
4  
5 **low back pain: Longitudinal data from the Norwegian HUNT Study**  
6  
7

8  
9 Running head: Comorbidities and prognosis of chronic low back pain  
10

11  
12  
13 AL Nordstoga<sup>1</sup>, TIL Nilsen<sup>1</sup>, O Vasseljen<sup>1</sup>, M Unsgaard-Tøndel<sup>1,2</sup>, PJ Mork<sup>1</sup>  
14  
15

16  
17  
18 <sup>1</sup>Department of Public Health and Nursing, Faculty of Medicine and Health Sciences,  
19  
20 Norwegian University of Science and Technology, Trondheim, Norway  
21

22 <sup>2</sup>Department of Neuromedicine and Movement Science, Faculty of Medicine and Health  
23  
24 Sciences, Norwegian University of Science and Technology, Trondheim, Norway  
25  
26

27  
28  
29 Corresponding author:

30  
31 Anne Lovise Nordstoga, Department of Public Health and Nursing, Norwegian University of  
32  
33 Science and Technology (NTNU), 7491 Trondheim, Norway.  
34

35 E-mail: [anne.l.nordstoga@ntnu.no](mailto:anne.l.nordstoga@ntnu.no), Phone number : +4799268260  
36  
37

38  
39  
40 Word count: 3308  
41  
42  
43  
44  
45  
46  
47  
48  
49  
50  
51  
52  
53  
54  
55  
56  
57  
58  
59  
60

## ABSTRACT

**Objectives:** This study aimed to investigate the prospective influence of multisite pain, depression, anxiety, self-rated health, and pain-related disability on recovery from chronic low back pain (LBP).

**Setting:** The data is derived from the second (1995-98) and third (2006-08) wave of the Nord-Trøndelag Health Study (HUNT) in Norway.

**Participants:** The study population comprises 4,484 women and 3,039 men in the Norwegian HUNT Study who reported chronic LBP at baseline in 1995-97.

**Primary outcome measures:** The primary outcome was recovery from chronic LBP at the 11-year follow-up. Persons not reporting pain and/or stiffness for at least three consecutive months during the last year, were defined as recovered. A Poisson regression model was used to estimate adjusted risk ratios (RRs) with 95% confidence intervals (CIs).

**Results:** At follow-up, 1,822 (40.6%) women and 1,578 (51.9%) men reported recovery from chronic LBP. The probability of recovery was inversely associated with number of pain sites in (P-trend<0.001). Compared to reporting 2-3 pain sites, persons with only LBP had a slightly higher probability of recovery (RR 1.10, 95% CI 0.98 to 1.22 in women and RR 1.10, 95% CI, 1.01 to 1.21 in men) whereas people 6-9 pain sites had substantially lower probability of recovery (RR 0.58, 95% CI, 0.52 to 0.63 in women and RR 0.70, 95% CI, 0.63 to 0.79 in men). Poor/not so good self-rated general health, symptoms of anxiety and depression, and pain related disability in work and leisure were all associated with reduced probability of recovery, but there was no statistical interaction between multisite pain and these comorbidities.

**Conclusions:** Increasing number of pain sites was inversely associated with recovery from chronic LBP. Additionally, factors such as poor self-rated health, psychological symptoms, and pain related disability may further reduce the probability of recovery from chronic LBP.

**Strengths and limitations of this study**

- The strengths of the current study are the large and unselected population of women and men with chronic LBP, the prospective design, and the possibility of adjusting for several potential confounding factors.
- A limitation is the lack of information about the course of LBP and the other variables between the HUNT2 and HUNT3 study.
- Furthermore, we cannot rule out that changes in lifestyle differed between those who experienced remission of symptoms and those who did not, e.g., individuals with a high number of pain sites at baseline could be less prone to adopt a healthy lifestyle during the follow-up period because of pain-related disability.

## INTRODUCTION

Low back pain (LBP) is a common cause of disability and is ranked as the most burdensome disease globally [1, 2]. LBP is the fourth most common diagnosis (after upper respiratory infection, hypertension, and coughing) seen in primary care [3] and approximately every fifth adult suffer from chronic LBP [4]. Thus, in addition to the suffering experienced by affected individuals, LBP represents a substantial economic burden to the society. This underscore the importance of increased knowledge about factors that can improve the prevention and management of chronic LBP.

Chronic LBP rarely exist as a separate entity and co-occurrence of multisite pain and other co-morbidities are common [5-9]. A large case-control study comprising more than 100,000 people showed that individuals with chronic low back had higher occurrence of other musculoskeletal conditions, depression, anxiety, and sleep disorders compared to controls without chronic LBP [10]. In particular, other chronic pain conditions are very prevalent among people with chronic LBP [5]. Number of pain sites by itself has been suggested to be dose-dependently related to reduced physical and mental function [11, 12] and there is data to support the notion that generalized pain differs markedly from conditions with only one or a few pain sites with respect to other risk factors [13]. Currently, there is a lack of longitudinal studies addressing how the extent of multisite pain influences the prognosis of chronic LBP. Moreover, it is unclear to what extent multisite pain interacts with other comorbid factors such as poor self-rated general health, pain-related disability and poor mental health to influence the prognosis of chronic LBP.

The main objective of this study was therefore to prospectively investigate the influence of common somatic and psychological comorbidities on prognosis of chronic LBP. We hypothesized 1) that multi-site chronic pain, poor self-rated general health, pain-related disability, and poor psychological health are factors that are inversely and independently



1  
2  
3 related to the probability of recovery from chronic LBP, and 2) that the possible association  
4 between number of pain sites and prognosis of LBP is modified by other somatic and  
5 psychological comorbidities.  
6  
7  
8  
9

## 10 11 **METHOD**

### 12 13 **Study population**

14  
15 In Nord-Trøndelag County, Norway, all inhabitants aged 20 years or older were invited to  
16 participate in three health surveys (the Nord-Trøndelag Health Study [the HUNT Study]), the  
17 first in 1984-86 (HUNT1), the second in 1995-97 (HUNT2), and last in 2006-08 (HUNT3).  
18  
19 The current study is based on data from HUNT2 and HUNT3. Of 93,898 eligible participants,  
20 65,237 (65.5%) accepted the invitation to participate in HUNT2. In HUNT3, a total of 93,860  
21 were invited, and 50,807 (54.1%) accepted the invitation. More detailed information about  
22 selection procedures, participation, and questionnaires used in the HUNT Study can be found  
23 at <http://www.ntnu.edu/hunt>.  
24  
25  
26  
27  
28  
29  
30  
31  
32

33 Information on lifestyle and health related factors were collected by questionnaires  
34 and a clinical examination at both HUNT2 and HUNT3. For the purpose of this study, we  
35 included data from the 37,070 people who participated at both surveys. We excluded 15,062  
36 women and 12,861 men who reported to be free from chronic LBP at HUNT2. Moreover, we  
37 excluded 1,557 persons with missing information on musculoskeletal pain at HUNT3 and 23  
38 persons without complete values on body mass index (BMI) from the clinical examination.  
39 Further, 44 persons defined as underweight ( $\text{BMI} < 18.5 \text{ kg/m}^2$ ) were additionally excluded  
40 from the analyses to reduce the possibility for reverse causation due to undetected disease.  
41 Thus, the prospective analyses were based on 4,484 women and 3,039 men. Each participant  
42 signed a written consent, and the study was approved by the Regional Committee for Ethics  
43 in Medical Research (project no. 2014/2044 REK midt, Norway).  
44  
45  
46  
47  
48  
49  
50  
51  
52  
53  
54  
55  
56  
57  
58  
59  
60

### **Chronic low back pain**

The questions about musculoskeletal pain were adopted from the Standard Nordic Questionnaire [14]. The participants were asked “During the last year, have you had pain and/or stiffness in your muscles and joint that lasted for at least three consecutive months?”. Response options were “yes” and “no”. If answering “yes”, the participants were asked to indicate the affected body area(s), i.e., up to nine body areas (neck, shoulders/upper arms, upper back, elbows, low back, wrists/hands, hips, knees, and ankles/feet). Chronic LBP was in both surveys defined by “yes” to the first question and low back indicated as an affected body area by the second questions. Persons who responded “yes” to the first questions but did not indicate low back as an affected body area were considered to be free from chronic LBP. Number of chronic pain sites were estimated by adding together pain-afflicted body areas, of which the total number of pain sites includes low back pain. The primary outcome was recovery from chronic LBP at the 11-year follow-up. Persons categorized with chronic LBP at HUNT2 responding “no” at HUNT3 to the question “During the last year, have you had pain and/or stiffness in your muscles and joint that lasted for at least three consecutive months?” were defined as recovered.

### **Pain related comorbidities**

The participants’ self-rated general health was evaluated using the question “How is your health at the moment?”, with response options “very good”, “good”, “not so good”, and “poor”. The answers were dichotomized into two groups: “very good/good” and “not so good/poor” in line with previous studies [15].

Pain-related disability was evaluated separately for work ability and leisure time activity. The question about work ability was: “Have the pain and/or stiffness reduced your

1  
2  
3 ability to work during the last year?" with four possible responses: "no, not significantly", "to  
4 some degree", "significantly", and "don't know". The first and last response options were  
5 merged and categorized as "no disability", and the two middle categories as "work disability".  
6  
7 For leisure time activity, the question was: "Have the pain/or stiffness reduced your leisure  
8 activity?" with possible responses: "yes" and "no". The responses on disability due to  
9 musculoskeletal symptoms were then categorized into four groups; "no disability", "work  
10 disability", "leisure disability", and "work and leisure disability".  
11  
12  
13  
14  
15  
16  
17

18 Symptoms of anxiety and depression were measured using the Hospital Anxiety and  
19 Depression Scale (HADS). HADS is a validated and well-established self-rating  
20 questionnaire including seven questions on anxiety and seven questions on depression [16].  
21  
22 As recommended, the cut-off score value was set to  $\geq 8$  on both anxiety and depression and  
23 were dichotomized as presence or no presence of anxiety and/or depression [16, 17].  
24  
25 Additionally, a mixed HADS variable were constructed consisting of four groups: "no  
26 depression or anxiety", "only depression", "only anxiety", and "both depression and anxiety"  
27 [18]. Symptoms of only depression or only anxiety was defined by a HADS score  $\geq 8$  on the  
28 respective subscales, while symptoms of both depression and anxiety was defined by a  
29 HADS score  $\geq 8$  on both subscales.  
30  
31  
32  
33  
34  
35  
36  
37  
38  
39  
40  
41

### 42 **Possible confounders**

43  
44 All estimated associations were adjusted for possible confounders. Age was categorized in  
45 20-29, 30-39, ...  $\geq 60$  years. BMI was calculated as weight divided by the square of height  
46 ( $\text{kg/m}^2$ ) by standardized measurements of height and weight from the clinical examination,  
47 and classified into BMI groups according to the suggestions by the World Health  
48 Organization (normal weight, overweight, obesity) [19]. Physical work demands was  
49 assessed by the question: 'If you have paid or unpaid work, how would you describe your  
50  
51  
52  
53  
54  
55  
56  
57  
58  
59  
60

work?’ with the possible responses: “mostly sedentary”, “much walking”, “much walking and lifting”, or “heavy physical work”. Leisure time physical activity was assessed by the question: “How much of your leisure time have you been physically active during the last year?” where the participants reported number of hours of light and/or hard activity. Four categories were constructed based on this information; “inactive” (no light or hard activity), “low activity” (<3 hours of light and no hard activity), “moderate activity” (≥3 hours light and/or <1 hours of hard activity) and “high activity” (any light and ≥1 hour of hard activity). Further, education was assessed by the question “what is your highest level of education?”, and were divided in 4 categories; “primary school”, “high school”, “college ≤4 years”, and “college >4 years”. Smoking was assessed by questions about past or present use of cigarettes, and were divided in three categories; “never smoker”, “previous smoker” and “current smoker”.

### Statistical analysis

We used a generalized linear model of the Poisson family to estimate the relative probability of recovery from chronic LBP as risk ratios (RR) with 95% confidence intervals (CI) . A RR above 1.0 indicates higher probability of recovery compared to the reference category, while a RR less than 1.0 indicates a reduced probability of recovery. All estimated associations were adjusted for age, BMI , physical activity , education , smoking and physical work demands . All main analyses were conducted separately for men and women. Furthermore, a test for linear trend (i.e., dose-response) across categories of number of pain sites was conducted by treating the categories as an ordinal variable in the regression model.

Additionally, we conducted analyses combining number of pain sites (<4 vs. 4-9 sites) and comorbid conditions in relation to the probability of recovery from chronic LBP.

Previous studies have shown that reporting of four or more pain sites is associated with a

1  
2  
3 markedly poorer prognosis of pain relief [20], as well as increasing likelihood of health care  
4 utilization and sickness absence [21]. Statistical interaction was evaluated by likelihood ratio  
5 tests of a product term of number of pain sites and each of the comorbid factors (self-reported  
6 health, pain-related disability and HADS). All statistical analyses were performed using Stata  
7 for Windows, version 13.1 (StataCorp LP, College Station, Texas).  
8  
9  
10  
11  
12

## 13 14 15 **RESULTS**

16  
17 Table 1 presents the baseline characteristics of the study population according to number of  
18 chronic pain sites. At baseline, 66.4% of the women and 47.2% of the men reported  $\geq 4$  pain  
19 sites. Of the 4,484 women and 3,039 men who reported chronic LBP at baseline (HUNT2),  
20 1,822 (40.6%) women and 1,578 (51.9%) men were reported recovered from chronic LBP at  
21 the 11-year follow-up (HUNT3).  
22  
23  
24  
25  
26  
27

28  
29 Table 2 shows the association between number of pain sites, pain-related disability,  
30 psychological symptoms, and self-rated general health with the probability of recovery from  
31 chronic LBP at follow-up. Increasing number of pain sites was inversely associated with the  
32 probability of recovery (P-trend $<0.001$  in both women and men). In specific, women and  
33 men who reported 6-9 pain sites had substantially lower probability of recovery (RR 0.58,  
34 95% CI, 0.52 to 0.63 and RR 0.70, 95% CI, 0.63 to 0.79, respectively), compared to women  
35 and men who reported 2-3 pain sites. People with only LBP had a slightly higher probability  
36 of recovery (RR 1.10, 95% CI 0.98 to 1.22 in women and RR 1.10, 95% CI 1.01 to 1.21 in  
37 men) compared to women and men who reported 2-3 pain sites. Pain-related disability that  
38 influenced both work ability and leisure activity was associated with reduced probability of  
39 recovery in both women (RR 0.68, 95% CI, 0.62 to 0.74] and men (RR 0.76, 95% CI, 0.70  
40 to 0.83). HADS score  $\geq 8$  on both depression and anxiety subscales was associated with  
41 reduced probability of recovery in both women (RR 0.77, 95% CI, 0.66 to 0.91) and men (RR  
42  
43  
44  
45  
46  
47  
48  
49  
50  
51  
52  
53  
54  
55  
56  
57  
58  
59  
60

Table 1. Baseline characteristics of the study population stratified by gender and number of chronic pain sites.

|                                                    | Women         |                | Men           |                |
|----------------------------------------------------|---------------|----------------|---------------|----------------|
|                                                    | <4 pain sites | 4-9 pain sites | <4 pain sites | 4-9 pain sites |
| No. of persons (%)                                 | 1,506 (33.6)  | 2,978 (66.4)   | 1,605 (52.8)  | 1,434 (47.2)   |
| Age (years), mean (SD)                             | 47.9 (13.6)   | 50.7 (11.9)    | 48.4 (12.1)   | 51.8 (11.4)    |
| Body mass index (kg/m <sup>2</sup> ), mean (SD)    | 26.1 (4.1)    | 27.0 (4.5)     | 26.5 (3.3)    | 27.0 (3.4)     |
| Physically inactive, no. (%)                       | 82 (5.4)      | 208 (7.0)      | 96 (6.0)      | 103 (7.2)      |
| Education ≤13 years, no. (%)                       | 1142 (75.8)   | 2470 (82.9)    | 1244 (77.5)   | 1220 (85.1)    |
| Current smoker, no. (%)                            | 427 (28.4)    | 1021 (34.3)    | 416 (25.9)    | 412 (28.7)     |
| Poor/not so good self-rated health, no. (%)        | 443 (29.4)    | 1786 (60.0)    | 461 (28.7)    | 831 (57.9)     |
| Pain-related disability, work and leisure, no. (%) | 726 (48.2)    | 2034 (68.3)    | 784 (48.8)    | 970 (67.6)     |
| HADS score depression >8, no. (%)                  | 65 (4.3)      | 187 (6.3)      | 96 (6.0)      | 124 (8.6)      |
| HADS score anxiety >8, no. (%)                     | 149 (9.9)     | 425 (14.3)     | 110 (6.9)     | 147 (10.3)     |

Abbreviations: HADS, Hospital Anxiety and Depression Scale; SD, standard deviation

Table 2. Relative probability of recovery from chronic low back pain at 11-years follow-up according to number of chronic pain sites, pain-related disability, the Hospital Anxiety and Depression Scale score, and self-rated general health at HUNT 2.

|                             | Women          |              |          |                                         | Men            |              |          |                                         |
|-----------------------------|----------------|--------------|----------|-----------------------------------------|----------------|--------------|----------|-----------------------------------------|
|                             | No. of persons | No. of cases | Crude RR | Multi-adjusted <sup>a</sup> RR (95% CI) | No. of persons | No. of cases | Crude RR | Multi-adjusted <sup>a</sup> RR (95% CI) |
| No. of pain sites           |                |              |          |                                         |                |              |          |                                         |
| 1                           | 326            | 189          | 1.13     | 1.10 (0.98 to 1.22)                     | 454            | 284          | 1.11     | 1.10 (1.01 to 1.21)                     |
| 2-3                         | 1,180          | 608          | 1.00     | 1.00 (reference)                        | 1,151          | 651          | 1.00     | 1.00 (reference)                        |
| 4-5                         | 1,330          | 557          | 0.81     | 0.83 (0.76 to 0.90)                     | 873            | 422          | 0.85     | 0.86 (0.79 to 0.94)                     |
| 6-9                         | 1,648          | 468          | 0.55     | 0.58 (0.52 to 0.63)                     | 561            | 221          | 0.70     | 0.70 (0.63 to 0.79)                     |
| Pain-related disability     |                |              |          |                                         |                |              |          |                                         |
| No disability               | 649            | 355          | 1.00     | 1.00 (reference)                        | 487            | 304          | 1.00     | 1.00 (reference)                        |
| Work disability             | 591            | 271          | 0.84     | 0.87 (0.78 to 0.98)                     | 430            | 249          | 0.93     | 0.94 (0.85 to 1.05)                     |
| Leisure disability          | 257            | 131          | 0.93     | 0.94 (0.82 to 1.08)                     | 250            | 143          | 0.92     | 0.90 (0.79 to 1.02)                     |
| Work and leisure disability | 2,760          | 964          | 0.64     | 0.68 (0.62 to 0.74)                     | 1,754          | 818          | 0.75     | 0.76 (0.70 to 0.83)                     |
| HADS                        |                |              |          |                                         |                |              |          |                                         |
| No depression or anxiety    | 2,572          | 1,103        | 1.00     | 1.00 (reference)                        | 2,050          | 1,110        | 1.00     | 1.00 (reference)                        |
| Depression                  | 252            | 90           | 0.83     | 0.90 (0.76 to 1.07)                     | 220            | 101          | 0.85     | 0.85 (0.73 to 0.99)                     |
| Anxiety                     | 574            | 215          | 0.87     | 0.88 (0.78 to 0.98)                     | 257            | 120          | 0.86     | 0.88 (0.77 to 1.01)                     |
| Depression and anxiety      | 342            | 107          | 0.73     | 0.77 (0.66 to 0.91)                     | 195            | 80           | 0.76     | 0.79 (0.67 to 0.94)                     |
| Self-rated general health   |                |              |          |                                         |                |              |          |                                         |
| Very good/good              | 2,208          | 1,099        | 1.00     | 1.00 (reference)                        | 1,730          | 1,017        | 1.00     | 1.00 (reference)                        |
| Poor/not so good            | 2,229          | 704          | 0.64     | 0.66 (0.61 to 0.71)                     | 1,292          | 551          | 0.73     | 0.72 (0.67 to 0.78)                     |

Abbreviations: CI, confidence interval; HADS, Hospital Anxiety and Depression Scale; RR, risk ratio

<sup>a</sup>Adjusted for age (19-29, 30-39, 40-49, 50-59, >60), education (primary school and lower secondary school, upper secondary school, higher education <4 years, higher education > 4 years, and unknown), body mass index (normal weight, overweight, obesity), physical activity (inactive, low activity, moderate activity, high activity, and unknown), smoking (never smoker, previous smoker, current smoker, and unknown) and physical work demands (mostly sedentary, much walking, much walking and lifting, heavy physical work, and unknown).

Table 3. Relative probability of recovery from chronic low back pain at 11-years follow-up according to the combined effect of number of chronic pain sites and pain-related disability, score on the hospital anxiety and depression scale, and self-rated general health at HUNT 2.

|                                  | 1-3 pain sites |              |                                         | 4-9 pain sites |              |                                         | P value <sup>b</sup> |
|----------------------------------|----------------|--------------|-----------------------------------------|----------------|--------------|-----------------------------------------|----------------------|
|                                  | No. of persons | No. of cases | Multi-adjusted <sup>a</sup> RR (95% CI) | No. of persons | No. of cases | Multi-adjusted <sup>a</sup> RR (95% CI) |                      |
| <b>Pain-related disability</b>   |                |              |                                         |                |              |                                         |                      |
| No disability                    | 714            | 448          | 1.00 (reference)                        | 422            | 211          | 0.84 (0.75 to 0.94)                     | 0.002                |
| Work disability                  | 466            | 270          | 0.94 (0.85 to 1.03)                     | 555            | 256          | 0.77 (0.69 to 0.86)                     | 0.002                |
| Leisure disability               | 271            | 172          | 0.98 (0.88 to 1.09)                     | 236            | 102          | 0.71 (0.61 to 0.83)                     | <0.001               |
| Work and leisure disability      | 1,510          | 756          | 0.81 (0.75 to 0.87)                     | 3,004          | 1,026        | 0.59 (0.54 to 0.64)                     | <0.001               |
| <b>HADS</b>                      |                |              |                                         |                |              |                                         |                      |
| No depression or anxiety         | 2,151          | 1,225        | 1.00 (reference)                        | 2,471          | 988          | 0.75 (0.70 to 0.80)                     | <0.001               |
| Depression                       | 161            | 84           | 0.92 (0.79 to 1.07)                     | 311            | 107          | 0.66 (0.56 to 0.77)                     | 0.002                |
| Anxiety                          | 259            | 142          | 1.00 (0.89 to 1.12)                     | 572            | 193          | 0.65 (0.58 to 0.73)                     | <0.001               |
| Depression and anxiety           | 138            | 69           | 0.92 (0.77 to 1.09)                     | 399            | 118          | 0.58 (0.49 to 0.68)                     | <0.001               |
| <b>Self-rated general health</b> |                |              |                                         |                |              |                                         |                      |
| Very good/good                   | 2,187          | 1,302        | 1.00 (reference)                        | 2,617          | 838          | 0.57 (0.53 to 0.61)                     | <0.001               |
| Not all good/poor                | 904            | 417          | 0.78 (0.72 to 0.85)                     | 1,751          | 814          | 0.82 (0.77 to 0.87)                     | 0.301                |

Abbreviations: CI, confidence interval; HADS, hospital anxiety and depression scale; RR, risk ratio.

<sup>a</sup>Adjusted for age (19-29, 30-39, 40-49, 50-59, >60), education (primary school and lower secondary school, upper secondary school, higher education <4 years, higher education > 4 years, and unknown), body mass index (normal weight, overweight, obesity), physical activity (inactive, low activity, moderate activity, high activity, and unknown), gender, smoking (never smoker, previous smoker, current smoker, and unknown) and physical work demands (mostly sedentary, much walking, much walking and lifting, heavy physical work and unknown).

<sup>b</sup>P-value from stratified analysis of number of pain sites by general health, physical disability, and HADS score.



0.79, 95% CI, 0.67 to 0.94). Persons reporting poor or not so good general health had a markedly reduced probability of recovery, both in women (RR 0.66, 95% CI, 0.61 to 0.71) and men (RR 0.72, 95% CI, 0.67 to 0.78), compared to those reporting good or very good general health.

Table 3 presents the combined effect of number of pain sites and pain-related disability, psychological symptoms, and self-rated general health on the probability of recovering for chronic LBP. We did not observe any statistical interaction between number of pain sites and pain-related disability, psychological symptoms or self-rated health ( $P \geq 0.24$  for all tests). However, stratified analysis within categories of the exposure variables showed that reporting of  $\geq 4$  pain sites was associated with lower probability of recovery independently of level of pain-related disability, and psychological symptoms. Within strata of pain-related disability, persons who reported  $\geq 4$  pain sites had 16% to 27% lower probability of remission compared to persons with 1-3 pain sites in the same pain-related disability categories. Likewise, within the different strata of psychological symptoms, persons with  $\geq 4$  pain sites had 25% to 35% lower probability of recovery compared to persons with 1-3 pain sites.

## DISCUSSION

In this large population-based study, we found that musculoskeletal comorbidity, reduced self-rated general health, and psychological symptoms were independently associated with reduced probability of recovery from chronic LBP at 11-year follow-up. The factors with the strongest association with poor prognosis were widespread chronic pain (6-9 pain sites) and poor or not so good self-rated general health. The strength of the associations between the various comorbidities and pain prognosis was fairly similar for women and men. Probability of recovery from chronic LBP was inversely associated with increasing number of chronic pain sites. Although there was no interaction between number of chronic pain sites and other

1  
2  
3 comorbidities, we observed in the combined analysis that persons with four or more pain sites  
4 had was associated with lower probability of recovery from chronic LBP within all strata of  
5 pain-related disability and symptoms of depression and/or anxiety. The current findings  
6 indicate that musculoskeletal comorbidity has a strong and independent influence on long-  
7 term prognosis of chronic LBP.  
8  
9  
10  
11  
12

13  
14 It is noteworthy that about 66% of the women and 47% of the men in this study  
15 reported four or more chronic pain sites at baseline. This supports the view that co-  
16 occurrence of musculoskeletal pain is very common in chronic LBP [5, 6]. To our  
17 knowledge, this is the first population-based study to investigate the prospective influence of  
18 graded musculoskeletal comorbidity on the prognosis of chronic LBP. The dose-response  
19 association between number of chronic pain sites and reduced probability of recovery from  
20 chronic LBP suggest that musculoskeletal comorbidity should be considered an important  
21 predictor in identifying target groups for public health secondary prevention. This was also  
22 supported by our combined analysis, showing that number of pain sites was the main driving  
23 factor for predicting persistence of chronic LBP.  
24  
25  
26  
27  
28  
29  
30  
31  
32  
33  
34

35  
36 More than 40% of the women and 50% of the men in the current study reported  
37 recovery from chronic LBP at 11-year follow-up. Interestingly, a previous study showed that  
38 the prevalence of chronic LBP was relatively stable from HUNT2 to HUNT3 with about 26%  
39 of women and 20% of men reporting chronic LBP at both surveys [22]. Thus, our results  
40 indicate that during an 11-year period a substantial proportion of the population shift from  
41 having chronic low back to remission, but that a substantial proportion also develops pain in  
42 the same period. Similar large fluctuations in reporting of chronic LBP at the individual level  
43 have also been observed by others [23, 24]. Thus, our findings lend further support to the  
44 notion that chronic LBP on the individual level may fluctuate substantially over time while  
45 the population prevalence remains relatively stable. The current study adds to this knowledge  
46  
47  
48  
49  
50  
51  
52  
53  
54  
55  
56  
57  
58  
59  
60

1  
2  
3 by showing that individuals who shift from having chronic low back symptoms to remission  
4 of symptoms are more likely to have fewer chronic pain sites, less pain-related disability,  
5 better self-rated health, and no major symptoms of anxiety or depression.  
6  
7

8  
9         Increasing number of chronic pain sites were inversely associated with probability of  
10 recovery, i.e., women and men who reported six or more pain sites had about 30-40% lower  
11 probability of recovery from chronic LBP compared to women and men with 2-3 pain sites.  
12  
13 Previous cross-sectional studies have indicated a dose-response association between number  
14 of pain sites and a range of negative health outcomes such as psychological distress, poor  
15 sleep, poor self-rated health, reduced social and functional ability [11] as well as increased  
16 sickness absence and health care utilization [25]. The current prospective study extends this  
17 body of knowledge showing that number of chronic pain sites have a strong dose-response  
18 influence on prognosis of chronic LBP. Although we observed no interaction between  
19 number of chronic pain sites and other comorbid factors, the probability of relief from  
20 chronic LBP was consistently lower for the group with multisite pain within all strata of pain-  
21 related disability and psychological symptoms scores. These findings support the long-held  
22 view that it may be useful to classify patients with chronic LBP into “back pain alone” or  
23 “back pain plus other pain” to improve clinical decision-making [26].  
24  
25  
26  
27  
28  
29  
30  
31  
32  
33  
34  
35  
36  
37  
38

39         The current finding of a dose-response association between number of chronic pain  
40 sites and prognosis of chronic LBP may indicate that the extent of musculoskeletal  
41 comorbidity could provide additional complementary information to improve classification in  
42 stratified care approaches. The idea that assessment of multisite pain can assist clinical  
43 judgment of prognosis and improve targeted treatment has been proposed before [6] and the  
44 current data lend further support to this idea. Furthermore, since number of chronic pain sites  
45 *per se* seem to be a strong prognostic factor in chronic LBP it may also be useful to consider  
46 this variable when recruiting subjects into research studies to facilitate baseline comparisons.  
47  
48  
49  
50  
51  
52  
53  
54  
55  
56  
57  
58  
59  
60

1  
2  
3 Although previous data indicate that psychological symptoms are more common in  
4 patients with LBP than in comparable controls [10], our results do not indicate that such  
5 symptoms strongly influence the prognosis of chronic LBP. However, another study of  
6 subjects with neck and/or LBP in HUNT 3 showed that symptoms of mental distress were  
7 significant determinants for seeking health care, which could have moderated the associations  
8 [27]. Our findings are in line with Dunn and colleagues [28] who found no significant  
9 association between depression, and only a modest association between anxiety, and the risk  
10 of disabling LBP at 12-months follow-up in patients presenting with LBP in general practice.  
11 In the same study, it was observed that self-rated health had a relatively strong impact on  
12 prognosis of LBP with patients who rated their health as poor having more than twofold  
13 increased risk of disabling back pain. Very few individuals in our study population rated their  
14 health as poor and we were therefore not able to estimate probability for recovery among  
15 these individuals. However, we observed that women and men who rated their health as less  
16 than good (i.e., poor or not so good) had about 30% lower probability of recovery from  
17 chronic LBP compared to those who rated their health as good or very good.  
18  
19  
20  
21  
22  
23  
24  
25  
26  
27  
28  
29  
30  
31  
32  
33  
34

35 The strengths of the current study are the large and unselected population of women  
36 and men with chronic LBP, the prospective design, and the possibility of adjusting for several  
37 potential confounding factors. The questions on chronic musculoskeletal pain used in  
38 HUNT2 have acceptable reliability and validity [14, 29, 30]. Likewise, the HADS scale has  
39 been shown to be a valid indicator of possible depression and anxiety in clinical practice as  
40 well as in the general population [16, 17, 31]. A limitation is the lack of follow-up  
41 information about the course of LBP and the other variables between the HUNT2 and  
42 HUNT3 study. Thus, any changes occurring during the follow-up period could not be taken  
43 into account in the analyses. For example, information regarding treatment during the follow-  
44 up period or information on changes in lifestyle could be of interest. A healthy lifestyle has  
45  
46  
47  
48  
49  
50  
51  
52  
53  
54  
55  
56  
57  
58  
59  
60

1  
2  
3 been associated with improved long-term outcome in individuals with recurrent LBP  
4  
5 episodes [32]. Thus, it may be possible that individuals who changed their lifestyle during the  
6  
7 follow-up period also altered their course of chronic LBP. Furthermore, we cannot rule out  
8  
9 that such changes in lifestyle was differential between participants who experienced  
10  
11 remission of symptoms versus those who did not, e.g., individuals with a high number of pain  
12  
13 sites at baseline could be less prone to adopt a healthy lifestyle during the follow-up period  
14  
15 because of pain-related disability.  
16

17  
18 In conclusion, the current study indicates that multisite chronic pain is independently  
19  
20 and inversely associated with the probability of recovery from chronic LBP. Poor self-rated  
21  
22 health, psychological symptoms, and pain related disability might further reduce the  
23  
24 probability of recovery from chronic LBP. There was no interaction between number of  
25  
26 chronic pain sites and other comorbidities, including pain-related disability, psychological  
27  
28 symptoms and self-rated general health. These findings underscore the importance of taking  
29  
30 comorbid symptoms into account, and in particular number of chronic pain sites, when  
31  
32 designing management programs or treatment for secondary prevention of chronic LBP.  
33  
34  
35  
36  
37  
38  
39  
40  
41  
42  
43  
44  
45  
46  
47  
48  
49  
50  
51  
52  
53  
54  
55  
56  
57  
58  
59  
60

## Acknowledgements

The HUNT Study is a collaboration between the HUNT Research Centre (Faculty of Medicine, Norwegian University of Science and Technology), Nord-Trøndelag County Council and The Norwegian Institute of Public Health

## Author Contributions

PJM, TILN and ALN designed the study, and all authors contributed in the discussion of the design and interpretation. ALN performed the analyses supervised by PJM and TILN. The first draft of the manuscript was written by PJM and ALN. All authors contributed to the final manuscript.

## Conflicts of interest

None declared.

## Data sharing

No additional data available.

## Funding sources

This study was supported by The Norwegian Fund for Post-Graduate Training in Physiotherapy and by grants from the Liaison Committee between the Central Norway Regional Health Authority and the Norwegian University of Science and Technology (NTNU).

## Ethical approval

1  
2  
3  
4  
5  
6  
7  
8  
9  
10  
11  
12  
13  
14  
15  
16  
17  
18  
19  
20  
21  
22  
23  
24  
25  
26  
27  
28  
29  
30  
31  
32  
33  
34  
35  
36  
37  
38  
39  
40  
41  
42  
43  
44  
45  
46  
47  
48  
49  
50  
51  
52  
53  
54  
55  
56  
57  
58  
59  
60

The current study was approved by the Regional Committee for Ethics in Medical Research (project no. 2014/2044 REK midt, Norway). The study was carried out according to the Declaration of Helsinki.

For peer review only

## References

- 1 Murray CJL, Vos T, Lozano R, *et al.* Disability-adjusted life years (DALYs) for 291 diseases and injuries in 21 regions, 1990-2010: A systematic analysis for the Global Burden of Disease Study 2010. *Lancet* 2012;**380**:2197-223.
- 2 Vos T, Flaxman AD, Naghavi M, *et al.* Years lived with disability (YLDs) for 1160 sequelae of 289 diseases and injuries 1990-2010: A systematic analysis for the Global Burden of Disease Study 2010. *Lancet* 2012;**380**:2163-96.
- 3 Wändell P, Carlsson AC, Wettermark B, *et al.* Most common diseases diagnosed in primary care in Stockholm, Sweden, in 2011. *Fam Pract* 2013;**30**:506-13.
- 4 Hoy D, Bain C, Williams G, *et al.* A systematic review of the global prevalence of low back pain. *Arthritis Rheum* 2012;**64**:2028-37.
- 5 Von Korff M, Crane P, Lane M, *et al.* Chronic spinal pain and physical-mental comorbidity in the United States: results from the national comorbidity survey replication. *Pain* 2005;**113**:331-9.
- 6 Hartvigsen J, Natvig B, Ferreira M. Is it all about a pain in the back? *Best Pract Res Clin Rheumatol* 2013;**27**:613-23.
- 7 Croft P. The question is not "have you got it"? But "how much of it have you got"? *Pain* 2009;**141**:6-7.
- 8 Hestbaek L, Leboeuf-Yde C, Manniche C. Is low back pain part of a general health pattern or is it a separate and distinctive entity? A critical literature review of comorbidity with low back pain. *J Manipulative Physiol Ther* 2003;**26**:243-52.
- 9 Ramond-Roquin A, Pecquenard F, Schers H, *et al.* Psychosocial, musculoskeletal and somatoform comorbidity in patients with chronic low back pain: original results from the Dutch Transition Project. *Fam Pract* 2015;**32**:297-304.



- 1  
2  
3 10 Gore M, Sadosky A, Stacey BR, *et al.* The burden of chronic low back pain: clinical  
4 comorbidities, treatment patterns, and health care costs in usual care settings. *Spine*  
5 2012;**37**:E668-77.  
6  
7  
8  
9 11 Kamaleri Y, Natvig B, Ihlebaek CM, *et al.* Number of pain sites is associated with  
10 demographic, lifestyle, and health-related factors in the general population. *Eur J Pain*  
11 2008;**12**:742-8.  
12  
13  
14  
15 12 Kamaleri Y, Natvig B, Ihlebaek CM, *et al.* Localized or widespread musculoskeletal  
16 pain: does it matter? *Pain* 2008;**138**:41-6.  
17  
18  
19  
20 13 Coggon D, Ntani G, Palmer KT, *et al.* Patterns of multisite pain and associations with  
21 risk factors. *Pain* 2013;**154**:1769-77.  
22  
23  
24  
25 14 Kuorinka I, Jonsson B, Kilbom A, *et al.* Standardized nordic questionnaires for the  
26 analysis of musculoskeletal symptoms. *Appl Ergon* 1987;**18**:233-7.  
27  
28  
29 15 Krokstad S, Kunst AE, Westin S. Trends in health inequalities by educational level in  
30 a Norwegian total population study. *J Epidemiol Community Health* 2002;**56**:375-80.  
31  
32  
33 16 Bjelland I, Dahl AA, Haug TT, *et al.* The validity of the Hospital Anxiety and  
34 Depression Scale. An updated literature review. *J Psychosom Res* 2002;**52**:69-77.  
35  
36  
37 17 Lisspers J, Nygren A, Soderman E. Hospital Anxiety and Depression Scale (HAD):  
38 some psychometric data for a Swedish sample. *Acta Psychiatr Scand* 1997;**96**:281-6.  
39  
40  
41 18 Mundal I, Grawe RW, Bjørngaard JH, *et al.* Prevalence and long-term predictors of  
42 persistent chronic widespread pain in the general population in an 11-year prospective study:  
43 the HUNT study. *BMC Musculoskelet Disord* 2014;**15**:213.  
44  
45  
46  
47 19 Physical status: The Use and Interpretation of Anthropometry. Report of a WHO  
48 Expert Committee. *WHO Technical Report Series no 854*. Geneva: World Health  
49 Organization 1995.  
50  
51  
52  
53  
54  
55  
56  
57  
58  
59  
60

- 1  
2  
3 20 Vasseljen O, Woodhouse A, Bjørngaard JH, *et al.* Natural course of acute neck and  
4  
5 low back pain in the general population: The HUNT study. *Pain* 2013;**154**:1237-44.  
6  
7 21 de Fernandes RC, Burdorf A. Associations of multisite pain with healthcare  
8  
9 utilization, sickness absence and restrictions at work. *Int Arch Occup Environ Health*  
10  
11 2016;**89**:1039-46.  
12  
13 22 Hagen K, Linde M, Heuch I, *et al.* Increasing prevalence of chronic musculoskeletal  
14  
15 complaints. A large 11-year follow-up in the general population (HUNT 2 and 3). *Pain Med*  
16  
17 2011;**12**:1657-66.  
18  
19 23 Hestbaek L, Leboeuf-Yde C, Engberg M, *et al.* The course of low back pain in a  
20  
21 general population. Results from a 5-year prospective study. *J Manipulative Physiol Ther*  
22  
23 2003;**26**:213-9.  
24  
25 24 Tamcan O, Mannion AF, Eisenring C, *et al.* The course of chronic and recurrent low  
26  
27 back pain in the general population. *Pain* 2010;**150**:451-7.  
28  
29 25 de Fernandes RC, Burdorf A. Associations of multisite pain with healthcare  
30  
31 utilization, sickness absence and restrictions at work. *International Archives of Occupational*  
32  
33 *and Environmental Health [Epub ahead of print]* 2016  
34  
35 26 Natvig B, Bruusgaard D, Eriksen W. Localized low back pain and low back pain as  
36  
37 part of widespread musculoskeletal pain: two different disorders? A cross-sectional  
38  
39 population study. *J Rehabil Med* 2001;**33**:21-5.  
40  
41 27 Woodhouse A, Pape K, Romundstad PR, *et al.* Health care contact following a new  
42  
43 incident neck or low back pain episode in the general population: The HUNT study. *BMC*  
44  
45 *Health Serv Res* 2016;**16**:81.  
46  
47 28 Dunn KM, Jordan KP, Croft PR. Contributions of prognostic factors for poor outcome  
48  
49 in primary care low back pain patients. *Eur J Pain* 2011;**15**:313-9.  
50  
51  
52  
53  
54  
55  
56  
57  
58  
59  
60

1  
2  
3 29 Descatha A, Roquelaure Y, Chastang JF, *et al.* Validity of Nordic-style questionnaires  
4  
5 in the surveillance of upper-limb work-related musculoskeletal disorders. *Scandinavian*  
6  
7 *Journal of Work, Environment & Health* 2007;**33**:58-65.

8  
9 30 Palmer K, Smith G, Kellingray S, *et al.* Repeatability and validity of an upper limb  
10  
11 and neck discomfort questionnaire: The utility of the standardized Nordic questionnaire.  
12  
13 *Occup Med* 1999;**49**:171-5.

14  
15 31 Østby-Deglum I, Mykletun A, Dahl AA. The Hospital Anxiety and Depression Rating  
16  
17 Scale (HADS) as a case finder for anxiety disorder and depression in Norwegian general  
18  
19 practices. *Acta Psychiatrica Scandinavica* 2004;**110**:43-4.

20  
21 32 Bohman T, Alfredsson L, Jensen I, *et al.* Does a healthy lifestyle behaviour influence  
22  
23 the prognosis of low back pain among men and women in a general population? A  
24  
25 population-based cohort study. *BMJ Open* 2014;**4**:e005713.  
26  
27  
28  
29  
30  
31  
32  
33  
34  
35  
36  
37  
38  
39  
40  
41  
42  
43  
44  
45  
46  
47  
48  
49  
50  
51  
52  
53  
54  
55  
56  
57  
58  
59  
60

**STROBE 2007 (v4) Statement—Checklist of items that should be included in reports of *cohort studies***

| Section/Topic                | Item # | Recommendation                                                                                                                                                                       | Reported on page # |
|------------------------------|--------|--------------------------------------------------------------------------------------------------------------------------------------------------------------------------------------|--------------------|
| Title and abstract           | 1      | (a) Indicate the study's design with a commonly used term in the title or the abstract                                                                                               | 1                  |
|                              |        | (b) Provide in the abstract an informative and balanced summary of what was done and what was found                                                                                  | 2                  |
| <b>Introduction</b>          |        |                                                                                                                                                                                      | <b>4</b>           |
| Background/rationale         | 2      | Explain the scientific background and rationale for the investigation being reported                                                                                                 | 4                  |
| Objectives                   | 3      | State specific objectives, including any prespecified hypotheses                                                                                                                     | 4/5                |
| <b>Methods</b>               |        |                                                                                                                                                                                      | <b>5</b>           |
| Study design                 | 4      | Present key elements of study design early in the paper                                                                                                                              | 5                  |
| Setting                      | 5      | Describe the setting, locations, and relevant dates, including periods of recruitment, exposure, follow-up, and data collection                                                      | 5                  |
| Participants                 | 6      | (a) Give the eligibility criteria, and the sources and methods of selection of participants. Describe methods of follow-up                                                           | 5                  |
|                              |        | (b) For matched studies, give matching criteria and number of exposed and unexposed                                                                                                  |                    |
| Variables                    | 7      | Clearly define all outcomes, exposures, predictors, potential confounders, and effect modifiers. Give diagnostic criteria, if applicable                                             | 6/7                |
| Data sources/<br>measurement | 8*     | For each variable of interest, give sources of data and details of methods of assessment (measurement). Describe comparability of assessment methods if there is more than one group | 6/7                |
| Bias                         | 9      | Describe any efforts to address potential sources of bias                                                                                                                            |                    |
| Study size                   | 10     | Explain how the study size was arrived at                                                                                                                                            | 5                  |
| Quantitative variables       | 11     | Explain how quantitative variables were handled in the analyses. If applicable, describe which groupings were chosen and why                                                         | 6/7                |
| Statistical methods          | 12     | (a) Describe all statistical methods, including those used to control for confounding                                                                                                | 7/8                |
|                              |        | (b) Describe any methods used to examine subgroups and interactions                                                                                                                  |                    |
|                              |        | (c) Explain how missing data were addressed                                                                                                                                          |                    |
|                              |        | (d) If applicable, explain how loss to follow-up was addressed                                                                                                                       |                    |
|                              |        | (e) Describe any sensitivity analyses                                                                                                                                                |                    |
| <b>Results</b>               |        |                                                                                                                                                                                      | <b>8</b>           |

|                          |     |                                                                                                                                                                                                              |          |
|--------------------------|-----|--------------------------------------------------------------------------------------------------------------------------------------------------------------------------------------------------------------|----------|
| Participants             | 13* | (a) Report numbers of individuals at each stage of study—eg numbers potentially eligible, examined for eligibility, confirmed eligible, included in the study, completing follow-up, and analysed            | 8        |
|                          |     | (b) Give reasons for non-participation at each stage                                                                                                                                                         | 5        |
|                          |     | (c) Consider use of a flow diagram                                                                                                                                                                           |          |
| Descriptive data         | 14* | (a) Give characteristics of study participants (eg demographic, clinical, social) and information on exposures and potential confounders                                                                     | 8/9      |
|                          |     | (b) Indicate number of participants with missing data for each variable of interest                                                                                                                          | 10/11    |
|                          |     | (c) Summarise follow-up time (eg, average and total amount)                                                                                                                                                  |          |
| Outcome data             | 15* | Report numbers of outcome events or summary measures over time                                                                                                                                               | 10/11    |
| Main results             | 16  | (a) Give unadjusted estimates and, if applicable, confounder-adjusted estimates and their precision (eg, 95% confidence interval). Make clear which confounders were adjusted for and why they were included | 8 and 12 |
|                          |     | (b) Report category boundaries when continuous variables were categorized                                                                                                                                    |          |
|                          |     | (c) If relevant, consider translating estimates of relative risk into absolute risk for a meaningful time period                                                                                             |          |
| Other analyses           | 17  | Report other analyses done—eg analyses of subgroups and interactions, and sensitivity analyses                                                                                                               | 12       |
| <b>Discussion</b>        |     |                                                                                                                                                                                                              | 12       |
| Key results              | 18  | Summarise key results with reference to study objectives                                                                                                                                                     | 12       |
| <b>Limitations</b>       |     |                                                                                                                                                                                                              |          |
| Interpretation           | 20  | Give a cautious overall interpretation of results considering objectives, limitations, multiplicity of analyses, results from similar studies, and other relevant evidence                                   | 13/16    |
| Generalisability         | 21  | Discuss the generalisability (external validity) of the study results                                                                                                                                        | 16       |
| <b>Other information</b> |     |                                                                                                                                                                                                              |          |
| Funding                  | 22  | Give the source of funding and the role of the funders for the present study and, if applicable, for the original study on which the present article is based                                                | 17       |

\*Give information separately for cases and controls in case-control studies and, if applicable, for exposed and unexposed groups in cohort and cross-sectional studies.

**Note:** An Explanation and Elaboration article discusses each checklist item and gives methodological background and published examples of transparent reporting. The STROBE checklist is best used in conjunction with this article (freely available on the Web sites of PLoS Medicine at <http://www.plosmedicine.org/>, Annals of Internal Medicine at <http://www.annals.org/>, and Epidemiology at <http://www.epidem.com/>). Information on the STROBE Initiative is available at [www.strobe-statement.org](http://www.strobe-statement.org).
